# 1 Systematic comparison and automated validation 2 of detailed models of hippocampal neurons

3

4

5 Sára Sáráy<sup>1,2\*</sup>, Christian A. Rössert<sup>3</sup>, Shailesh Appukuttan<sup>4</sup>, Rosanna Migliore<sup>5</sup>, Paola Vitale<sup>5</sup>,  
6 Carmen A. Lupascu<sup>5</sup>, Luca L. Bologna<sup>5</sup>, Werner Van Geit<sup>3</sup>, Armando Romani<sup>3</sup>, Andrew P.  
7 Davison<sup>4</sup>, Eilif Muller<sup>3</sup>, Tamás F. Freund<sup>1,2</sup>, Szabolcs Káli<sup>1,2\*</sup>

8

9

10 <sup>1</sup>Faculty of Information Technology and Bionics, Pázmány Péter Catholic University,  
11 Budapest, Hungary

12 <sup>2</sup> Institute of Experimental Medicine, Budapest, Hungary,

13 <sup>3</sup> Blue Brain Project, École Polytechnique Fédérale de Lausanne, Geneva, Switzerland,

14 <sup>4</sup>Paris-Saclay Institute of Neuroscience, Centre National de la Recherche Scientifique/  
15 Université Paris-Saclay, Gif-sur-Yvette, France,

16 <sup>5</sup>Institute of Biophysics, National Research Council, Palermo, Italy.

17

18 \* Corresponding author: saray.sara@koki.mta.hu (SS), kali@koki.hu (SK)

## 19 **Abstract**

20

21 Anatomically and biophysically detailed data-driven neuronal models can be useful  
22 tools in understanding and predicting the behavior and function of neurons. Due to the  
23 increasing availability of experimental data from anatomical and electrophysiological  
24 measurements as well as the growing number of computational and software tools that enable  
25 accurate neuronal modeling, there are now a large number of different models of many cell  
26 types available in the literature. These models were usually built to capture a few important or  
27 interesting properties of the given neuron type, and it is often unknown how they would behave  
28 outside their original context. This limits the re-use and further development of the existing  
29 models, and thus prevents the building of consensus “community models” that could capture  
30 an increasing proportion of the electrophysiological properties of the given cell type. We  
31 addressed this problem for the representative case of the CA1 pyramidal cell of the rat  
32 hippocampus by developing an open-source Python test suite, which makes it possible to  
33 automatically and systematically test the generalization properties of models by making  
34 quantitative comparisons between the models and electrophysiological data. The tests cover  
35 various aspects of somatic behavior, and signal propagation and integration in apical dendrites.  
36 To demonstrate the utility of our approach, we applied our validation tests to compare the  
37 behavior of several different hippocampal CA1 pyramidal cell models from the ModelDB  
38 database against electrophysiological data available in the literature, and concluded that all of  
39 these models perform well in some domains but badly in others. We also show how we  
40 employed the test suite to aid the development of models within the European Human Brain  
41 Project (HBP), and describe the integration of the tests into the validation framework developed

42 in the HBP, with the aim of facilitating more reproducible and transparent community model  
43 building.

44

## 45 **Author summary**

46

47 Anatomically and biophysically detailed neuronal models are useful tools in  
48 neuroscience because they allow the prediction of the behavior and the function of the studied  
49 cell type under circumstances that are hard to investigate experimentally. However, most  
50 detailed biophysical models have been built to capture only a few properties of the real neuron,  
51 and it is often unknown how they would behave under different circumstances, or whether they  
52 can be used to successfully answer different scientific questions. To help the modeling  
53 community develop neural models that generalize better, and make the process of model  
54 building more reproducible and transparent, we developed a test suite that enables the  
55 comparison of the behavior of models of neurons in the rat hippocampus and their evaluation  
56 against experimental data. Applying our tests to several models available in the literature, we  
57 show that each model is able to capture some of the important properties of the real neuron but  
58 performs badly in other domains. We also use the test suite in the model development workflow  
59 of the European Human Brain Project to aid the construction of better models of hippocampal  
60 neurons and networks.

## 61 **Introduction**

62

63         The construction and simulation of anatomically and biophysically detailed models is  
64 becoming a standard tool in neuroscience [1]. Such models, which typically employ the  
65 compartmental modeling approach and a Hodgkin-Huxley-type description of voltage-gated  
66 ion channels, are capable of providing fairly accurate models of single neurons [2–9] and (when  
67 complemented by appropriate models of synaptic interactions) even large-scale circuits [10–  
68 13]. However, building such detailed multi-compartmental models of neurons requires setting  
69 a large number of parameters (such as the densities of various ion channels in multiple neuronal  
70 compartments) that are often not directly constrained by the available experimental data. These  
71 parameters are typically tuned (either manually or using automated parameter-search methods  
72 [9,14–16]) until the simulated physiological behavior of the model matches some pre-defined  
73 set of experimental observations.

74         For an increasing number of cell types, the available experimental data already provide  
75 diverse constraints on the expected physiological behavior of the neuron under a variety of  
76 conditions. However, only a small subset of these constraints is typically taken into account  
77 when the models are developed, and it is often unknown, even by their developers, how these  
78 models would behave in other situations, outside their original context. This sparsity of  
79 information about the performance of detailed models might be one reason why model re-use  
80 in the community is relatively limited, and there are often a large number of different models  
81 of the same cell type available in the literature that were developed for different purposes. As  
82 an example, there are currently 129 different models related to the hippocampal CA1 pyramidal  
83 cell (PC) in the ModelDB database [17]. In addition, even when models are re-used, they are  
84 often altered to fit a different subset of the available experimental data, and they may lose their

85 ability to capture the behaviors that were used to constrain the original model. This phenomenon  
86 (whereby introducing new features breaks previously correct behavior) is known as a  
87 “regression” in software development, and is typically avoided by regularly applying a set of  
88 tests that comprehensively verify the correct behavior of the software under various  
89 circumstances. Such comprehensive checks are not routinely performed when neural models  
90 are developed – and this may be one of the reasons why the development of consensus  
91 (community) models, which would aim to capture a wide range of experimental observations  
92 by integrating diverse efforts, has rarely been attempted in neuroscience.

93 A collaborative approach to modeling, and even a systematic comparison of existing  
94 models built in different laboratories, requires the development of a comprehensive validation  
95 suite, a set of automated tests that quantitatively compare various aspects of model behavior  
96 with the corresponding experimental data. Such validation suites enable all modeling groups to  
97 evaluate their existing and newly developed models according to common, standardized  
98 criteria, thus facilitating model comparison and providing an objective measure of progress in  
99 matching relevant experimental observations. Applying automated tests also allows researchers  
100 to learn more about models published by other groups (beyond the results included in the  
101 papers) with relatively little effort, thus facilitating optimal model re-use and co-operative  
102 model development. Systematic testing of models during their development also helps avoid  
103 regressions, aids the identification of problematic aspects of model behavior, and is thus  
104 expected to lead to an increased efficiency in developing good models. The technical  
105 framework for developing such test suites already exists [18], and is currently used by several  
106 groups to create a variety of tests for models of neural structure and function at different scales  
107 [19–23]. In the current study, our goal was to develop a validation suite for the physiological  
108 behavior of one of the most studied cell types of the mammalian brain, the pyramidal cell in  
109 area CA1 of the rat hippocampus.

110 CA1 pyramidal neurons display a large repertoire of nonlinear responses in all of their  
111 compartments (including the soma, axon, and various functionally distinct parts of the dendritic  
112 tree), which are experimentally well-characterized. In particular, there are detailed quantitative  
113 results available on the subthreshold and spiking voltage response to somatic current injections  
114 [3,24]; on the properties of the action potentials back-propagating from the soma into the  
115 dendrites [25–27], which is a basic measure of dendritic excitability; and on the characteristics  
116 of the spread [28] and non-linear integration of synaptically evoked signals in the dendrites,  
117 including the conditions necessary for the generation of dendritic spikes [29–32].

118 The test suite that we have developed allows the quantitative comparison of the behavior  
119 of anatomically and biophysically detailed models of CA1 pyramidal neurons with  
120 experimental data in all of these domains. In this paper, we first describe the implementation of  
121 the HippoUnit validation suite. Next, we show how we used this test suite to systematically  
122 compare existing models from six prominent publications from different laboratories. We then  
123 show an example of how the tests have been applied to aid the development of new models in  
124 the context of the European Human Brain Project (HBP). Finally, we describe the integration  
125 of our test suite into the general validation framework developed in the HBP.

126

## 127 **Methods**

### 128 **Implementation of HippoUnit**

129

130 HippoUnit is a Python test suite based on the SciUnit [18] framework, which is a Python  
131 package for testing scientific models, and during its implementation the NeuronUnit package  
132 [19] was taken into account as an example of how to use the SciUnit framework for testing  
133 neuronal models. In SciUnit tests usually four main classes are implemented: the test class, the

134 model class, the capabilities class and the score class. HippoUnit is built in a way that keeps  
135 this structure. The key idea behind this structure is the decoupling of the model implementation  
136 from the test implementation by defining standardized interfaces (capabilities) between them,  
137 so that tests can easily be used with different models without being rewritten, and models can  
138 easily be adapted to fit the framework.

139 Each test of HippoUnit is a separate Python class that, similarly to other SciUnit  
140 packages, can run simulations on the models to generate model *predictions*, which can be  
141 compared with experimental *observations* to yield the final score, provided that the model has  
142 the required capabilities implemented to mimic the appropriate experimental protocol and  
143 produce the same type of measurable output. All measured or calculated data that contribute to  
144 the final score are saved in JSON or pickle files (or, in many cases, in both types of files). JSON  
145 files are human readable, and can be easily loaded into Python dictionaries. Data with a more  
146 complex structure are saved into pickle files. This makes it possible to easily write and read the  
147 data (for further processing or analysis) without changing its Python structure, no matter what  
148 type of object or variable it is.

149 Similarly to many of the existing SciUnit packages the implementations of specific  
150 models are not part of the HippoUnit package itself. Instead, HippoUnit contains a general  
151 `ModelLoader` class. This class is implemented in a way that it is able to load and deal with  
152 most types of models defined in the HOC language of the NEURON simulator (either as  
153 standalone HOC models or as HOC templates) [33]. It implements all model-related methods  
154 (capabilities) that are needed to simulate these kinds of neural models in order to generate the  
155 prediction without any further coding required from the user.

156 For the smooth validation of the models developed using parameter optimization within  
157 the HBP there is a child class of the `ModelLoader` available in HippoUnit that is called  
158 `ModelLoader_BPO`. This class inherits most of the functions (especially the capability

159 functions) from the `ModelLoader` class, but it implements additional functions that are able to  
160 automatically deal with the specific way in which information is represented and stored in these  
161 optimized models. The role of these functions is to gather all the information from the metadata  
162 and configuration files of the models that are needed to set the parameters required to load the  
163 models and run the simulations on them (such as path to the model files, name of the model  
164 template or the simulation temperature (the `celsius` variable of `Neuron`)). This enables the  
165 validation of these models without any manual intervention needed from the user. The section  
166 lists required by the tests of `HippoUnit` are also created automatically using the morphology  
167 files of these models (for details see the “Classify apical sections of pyramidal cells”  
168 subsection). For neural models developed using other software and methods, the user needs to  
169 implement the capabilities through which the tests of `HippoUnit` perform the simulations and  
170 recordings on the model.

171         The capabilities are the interface between the tests and the models. The `ModelLoader`  
172 class inherits from the capabilities and must implement the methods of the capability. The test  
173 can only be run on a model if the necessary capability methods are implemented in the  
174 `ModelLoader`. All communication between the test and the model happens through the  
175 capabilities.

176         The methods of the score classes perform the quantitative comparison between the  
177 *prediction* and the *observation*, and return the score object containing the final score and some  
178 related data, such as the paths to the saved figure and data (JSON) files and the prediction and  
179 observation data. Although `SciUnit` and `NeuronUnit` have a number of different score types  
180 implemented, `HippoUnit` has its own scores, which better fit its tests and the observations  
181 belonging to them. For simplicity, we refer to the discrepancy between the target experimental  
182 data (*observation*) and the models’ behavior (*prediction*) with respect to a studied feature using  
183 the term feature error. In most cases, when the basic statistics (mean and standard deviation) of



184 the experimental features (typically measured in several different cells of the same cell type)  
185 are available, feature errors are computed as the absolute difference between the feature value  
186 of the model and the experimental mean feature value, divided by the experimental standard  
187 deviation (Z-score) [34]. The final score of a given test achieved by a given model is given by  
188 the average (or, in some cases, the sum) of the feature error scores for all the features evaluated  
189 by the test.

190

## 191 **Implementation of the tests of HippoUnit**

### 192 **The Somatic Features Test**

193

194 The Somatic Features Test uses the Electrophys Feature Extraction Library (eFEL) [35]  
195 to extract and evaluate the values of both subthreshold and suprathreshold (spiking) features  
196 from voltage traces that represent the response of the model to somatic current injections of  
197 different positive (depolarizing) and negative (hyperpolarizing) current amplitudes. Spiking  
198 features describe action potential shape (like AP width, AP rise/fall rate, AP amplitude, etc.)  
199 and timing (frequency, inter-spike intervals, time to first/last spike, etc.), while some passive  
200 features (such as the voltage base or the steady state voltage), and subthreshold features for  
201 negative current stimuli (voltage deflection, sag amplitude, etc.) are also examined.

202 In this test step currents of varying amplitudes are injected into the soma of the model  
203 and the voltage response is recorded. The simulation protocol is set according to an input  
204 configuration JSON file, which contains all the current amplitudes, the delay and the duration  
205 of the stimuli, and the stimulation and recording positions. Simulations using different current  
206 amplitudes are run in parallel if this is supported by the computing environment.

207           As the voltage responses of neurons to somatic current injections can strongly depend  
208 on the experimental method, and especially on the type of electrode used, target values for these  
209 features were extracted from two different datasets. One dataset was obtained from sharp  
210 electrode recordings from adult rat CA1 neurons (sharp electrode data set) [3], and the other  
211 dataset is from patch clamp recordings in rat CA1 pyramidal cells (data provided by Judit  
212 Makara (patch clamp dataset)). For both of these datasets we had access to the recorded voltage  
213 traces from multiple neurons, which made it possible to perform our own feature extraction  
214 using eFEL. This ensures that the features are interpreted and calculated the same way for both  
215 the experimental data and the models' voltage response during the simulation. Furthermore, it  
216 allows a more thorough comparison against a large number of features extracted from  
217 experimental recordings yielded using the exact same protocol, which is unlikely to be found  
218 in any paper of the available literature. However, to see how representative these datasets are  
219 of the literature as a whole we first compared some of the features extracted from these datasets  
220 to data available on Neuroelectro.org [36] and on Hippocampome.org [37]. The features we  
221 compared were the following: resting potential, voltage threshold, after-hyperpolarization  
222 (AHP) amplitudes (fast, slow), action potential width and sag ratio. Although these databases  
223 have mean and standard deviation values for these features that are calculated from  
224 measurements using different methods, protocols and from different animals, we found that  
225 most of the feature values for our two experimental datasets fall into the ranges declared as  
226 typical for CA1 PCs in the online databases. The only conspicuous exception is the fast AHP  
227 amplitude of the patch clamp dataset used in this study, which is  $1.7 \pm 1.5$  mV, while the  
228 databases cite values between 6.8 and 11.64 mV. This deviation could possibly stem from a  
229 difference in the way that the fast AHP is measured.

230           We also performed a more specific review of the relevant literature to compare the most  
231 important somatic features of the patch clamp dataset to results from available patch clamp

232 recordings. In the literature the somatic AP voltage threshold of CA1 pyramidal cells is between  
233 -46 and -53 mV [38–41]. The same feature (*AP\_begin\_voltage*) extracted from out patch clamp  
234 dataset falls into this range (-51.13±0.97 mV (0.15 nA current step), -50.14±1.97 mV (0.2 nA  
235 current step); -49.36±2.02 mV (0.25 nA current step)). The AP amplitude falls into a relatively  
236 broad range between 71 and 112 mV according to the literature [38,41,42]. As most of these  
237 sources calculate the amplitude between the peak and the voltage base, we take the eFEL feature  
238 *AP\_amplitude\_from\_voltagebase* into account here. The value of it in our patch clamp dataset  
239 is similar to the experimental observations (98.36±5.82 mV (0.15 nA current step), 96.83±5.66  
240 mV (0.2 nA current step), 95.99±5.22 mV (0.25 nA current step)). The AP width measured at  
241 half amplitude ranges from 0.8 to 1.29 ms in the literature [38,40–42]. The value of this feature  
242 is near the upper end of this range in our patch clamp dataset (1.23±0.096 ms (0.15 nA step  
243 current); 1.25±0.11 ms (0.2 nA step current); 1.32±0.086 ms (0.25 nA step current)). Regarding  
244 the features extracted from response to hyperpolarizing currents the sag ratio can be compared.  
245 The values from literature are: 0.84±0.02 [42] and 0.83±0.01 [43], while the values extracted  
246 from our patch clamp dataset are quite similar (0.79±0.023 (-0.05 nA step current); 0.81±0.03  
247 (-0.1 nA step current); 0.81±0.027 (-0.15 nA step current); 0.81±0.03 (-0.2 nA step current);  
248 0.80±0.03 (-0.25 nA step current). We conclude that the patch clamp dataset is in good  
249 agreement with experimental observations available in the literature, and will be used as a  
250 representative example in this study.

251         The *observation* data are loaded from a JSON file of a given format which contains the  
252 names of the features to be evaluated, the current amplitude for which the given feature is  
253 evaluated and the corresponding experimental mean and standard deviation values. Setting the  
254 *specify\_data\_set* parameter it can be ensured that the test results against different  
255 experimental data sets are saved into different folders.

256 For certain features eFEL returns a vector as a result; in these cases, the feature value  
257 used by HippoUnit is the average of the elements of the vector. These are typically spiking  
258 features for which eFEL extracts a value corresponding to each spike fired. For features that  
259 use the ‘AP\_begin\_time’ or ‘AP\_begin\_voltage’ feature values for further calculations, we  
260 exclude the first element of the vector output before averaging because we discovered that these  
261 features are often incorrectly detected for the first action potential of a train.

262 The score class of this test returns as the final score the average of *Z-scores* for the  
263 evaluated eFEL features achieved by the model. Those features that could not be evaluated  
264 (e.g., spiking features from voltage responses without any spikes) are listed in a log file to  
265 inform the user, and the number of successfully evaluated features out of the number of features  
266 attempted to be evaluated is also reported.

267

## 268 **The Depolarization Block Test**

269

270 This test aims to determine whether the model enters depolarization block in response  
271 to a prolonged, high intensity somatic current stimulus. For CA1 pyramidal cells, the test relies  
272 on experimental data from Bianchi et al. [24]. According to these data, CA1 PCs respond to  
273 somatic current injections of increasing intensity with an increasing number of action potentials  
274 until a certain threshold current intensity is reached. For current intensities higher than the  
275 threshold, the cell does not fire over the whole period of the stimulus; instead, firing stops after  
276 some action potentials, and the membrane potential is sustained at some constant depolarized  
277 level for the rest of the stimulus. This phenomenon is termed depolarization block [24].

278 This test uses the same capability class as the Somatic Features Test for injecting current  
279 and recording the somatic membrane potential (see the description above). Using this

280 capability, the model is stimulated with 1000 ms long square current pulses increasing in  
281 amplitude from 0 to 1.6 nA in 0.05 nA steps, analogous to the experimental protocol. The  
282 stimuli of different amplitudes are run in parallel. Somatic spikes are detected and counted using  
283 eFEL [35].

284 From the somatic voltage responses of the model, the following features are evaluated.  
285  $I_{th}$  is the threshold current to reach depolarization block; experimentally, this is both the  
286 amplitude of the current injection at which the cell exhibits the maximum number of spikes,  
287 and the highest stimulus amplitude that does not elicit depolarization block. In the test two  
288 separate features are evaluated for the model and compared to the experimental  $I_{th}$ : the current  
289 intensity for which the model fires the maximum number of action potentials ( $I_{maxNumAP}$ ),  
290 and the current intensity one step before the model enters depolarization block  
291 ( $I_{below\_depol\_block}$ ). If these two feature values are not equal, a penalty is added to the score.  
292 The model is defined to exhibit depolarization block if  $I_{maxNumAP}$  is not the highest  
293 amplitude tested, and if there exists a current intensity higher than  $I_{maxNumAP}$ , for which the  
294 model does not fire action potentials during the last 100 ms of its voltage response.

295 In the experiment the  $V_{eq}$  feature is extracted from the voltage response of the pyramidal  
296 cells to the current injection one step above  $I_{th}$  (or  $I_{max\_num\_AP}$  in the test). Both in the  
297 experiment and in this test this is calculated as the mean voltage over the last 100 ms of the  
298 voltage trace. However, in the test, before calculating this value it is examined whether there  
299 are any action potentials during this period. The presence of spikes here means that the model  
300 did not enter depolarization block prior to this period. In these cases the test iterates further on  
301 the voltage traces corresponding to larger current steps to find if there is any where the model  
302 actually entered depolarization block; if an appropriate trace is found, the value of  $V_{eq}$  is  
303 extracted there. This trace is the response to the current intensity one step above  
304  $I_{below\_depol\_block}$ .

305           If the model does not enter depolarization block, a penalty is applied, and the final score  
306 gets the value of 100. Otherwise, the final score achieved by the model on this test is the average  
307 of the error scores (Z-scores) for the features described above, plus an additional penalty if  
308  $I_{maxNumAP}$  and  $I_{below\_depol\_block}$  differ. This penalty is 200 times the difference  
309 between the two current amplitude values (in pA – which in this case is 10 times the number of  
310 examined steps between them).

311

### 312 **The Back-propagating AP Test**

313

314           This test evaluates the strength of action potential back-propagation in the apical trunk  
315 at locations of different distances from the soma. The observation data for this test were yielded  
316 by the digitization of Figure 1B of [26], using the DigitizeIt software [44]. The values were  
317 then averaged over distances of 50, 150, 250,  $350 \pm 20$   $\mu\text{m}$  from the soma to get the mean and  
318 standard deviation of the features. The features tested here are the amplitudes of the first and  
319 last action potentials of a 15 Hz spike train, measured at the 4 different dendritic locations.

320           The test automatically finds current amplitudes for which the soma fires, on average,  
321 between 10-20 Hz and chooses the amplitude that leads to firing nearest to 15 Hz. For this task,  
322 the following algorithm was implemented. Increasing current step stimuli of 0.0 - 1.0 nA  
323 amplitude with a step size of 0.1 nA are applied to the model and the number of spikes is  
324 counted for each resulting voltage trace. If spontaneous spiking occurs (i.e., if there are spikes  
325 even when no current is injected) or if the spiking rate does not reach 10 Hz even for the highest  
326 amplitude, the test quits with an error message. Otherwise the amplitudes for which the soma  
327 fires between 10 and 20 Hz are appended to a list and (if the list is not empty) the one providing  
328 the spiking rate nearest to 15 Hz is chosen. If the list is empty because the spiking rate is smaller

329 than 10 Hz for a step amplitude but higher than 20 Hz for the next step, a binary search method  
330 is used to find an appropriate amplitude in this range.

331 This test uses a trunk section list (or generates one if the `find_section_lists`  
332 variable of the `ModelLoader` is set to `True` – see the section ‘Classifying the apical sections of  
333 pyramidal cells’ below) to automatically find the dendritic locations for the measurements. The  
334 desired distances of the locations from the soma and the distance tolerance are read from the  
335 input configuration file, and must agree with the distances and the tolerance over which the  
336 experimental data were averaged. All the trunk dendritic segments whose distance from the  
337 soma falls into one of the distance ranges are selected. The locations and also their distances  
338 are then returned in separate dictionaries.

339 Then the soma is stimulated with a current injection of the previously chosen amplitude  
340 and the voltage response of the soma and the selected dendritic locations are recorded and  
341 returned.

342 The test implements its own function to extract the amplitudes of back-propagating  
343 action potentials, but the method is based on eFEL features. This is needed because eFEL’s  
344 spike detection is based on a given threshold value for spike initiation, which may not be  
345 reached by the back-propagating signal at more distant regions. First the maximum  
346 depolarization of the first and the last action potentials are calculated. This is the maximum  
347 value of the voltage trace in a time interval around the somatic action potential, based on the  
348 start time of the spike (using the `AP_begin_time` feature of eFEL) and the inter-spike interval  
349 to the next spike recorded at the soma. Then the amplitudes are calculated as the difference  
350 between this maximum value and the voltage at the begin time of the spike (on the soma) minus  
351 1 ms (which is early enough not to include the rising phase of the spike, and late enough in the  
352 case of the last action potential not to include the afterhyperpolarization of the previous spike).

353 To calculate the feature error scores the amplitude values are first averaged over the  
354 distance ranges to be compared to the experimental data and get the feature Z-scores. The final  
355 score here is the average of the Z-scores achieved for the features of first and last action  
356 potential amplitudes at different dendritic distances. In the result it is also stated whether the  
357 model is more like a strongly or a weakly propagating cell in the experiment, where they found  
358 examples of both types [26].

359

### 360 **The PSP Attenuation Test**

361

362 The PSP Attenuation test evaluates how much the post-synaptic potential attenuates as it  
363 propagates from different dendritic locations to the soma in CA1 pyramidal cell models. The  
364 *observation* data for this test were yielded by the digitization of Figure 1E and Figure 2B of  
365 Magee and Cook, 2000 [28] using the DigitizeIt software [44]. The somatic and dendritic  
366 depolarization values were then averaged over distances of 100, 200, 300  $\pm$  50  $\mu$ m from the  
367 soma and the soma/dendrite attenuation was calculated to get the mean and standard deviation  
368 of the attenuation features at the three different input distances.

369 In this test the apical trunk receives excitatory post-synaptic current (EPSC)-shaped  
370 current stimuli at locations of different distances from the soma. The maximum depolarization  
371 caused by the input is extracted at the soma and divided by the maximum depolarization at the  
372 location of the stimulus to get the soma/dendrite attenuation values that are then averaged in  
373 distance ranges of 100, 200, 300  $\pm$  50  $\mu$ m and compared to the experimental data. The distances  
374 and tolerance are defined in the configuration file and must agree with how the *observation* data  
375 were generated.



376           The test uses a trunk section list, which needs to be specified in the NEURON HOC  
377 model (or the test generates one if the `find_section_lists` variable of the `ModelLoader`  
378 is set to True – see the section ‘Classify apical sections of pyramidal cells’ below) to find the  
379 dendritic locations to be stimulated. Randomly selected dendritic locations are used because the  
380 distance ranges that are evaluated cover almost the whole length of the trunk of a pyramidal  
381 cell. The probability of selecting a given dendritic segment is set to be proportional to its length.  
382 The number of dendritic segments examined can be chosen by the user by setting the  
383 `num_of_dend_locations` argument of the test. The random seed (also an argument of the  
384 test) must be kept constant to make the selection reproducible. If a given segment is selected  
385 multiple times (or it is closer than 50  $\mu\text{m}$  or further than 350  $\mu\text{m}$ ), a new random number is  
386 generated. If the number of locations to be selected is more than the number of trunk segments  
387 available in the model, all the segments are selected.

388           The *Exp2Syn* synaptic model of NEURON with a previously calculated weight is used to  
389 stimulate the dendrite. The desired EPSC amplitude and time constants are given in the input  
390 configuration file according to the experimental protocol. To get the proper synaptic weight,  
391 first the stimulus is run with `weight = 0`. The last 10% of the trace is averaged to get the resting  
392 membrane potential ( $V_m$ ). Then the synaptic weight required to induce EPSCs with the  
393 experimentally determined amplitude is calculated according to Equation 1:

$$394 \quad (1) \text{ weight} = - \text{EPSC\_amp} / V_m$$

395 where `EPSC_amp` is read from the `config` dictionary, and the synaptic reversal potential is  
396 assumed to be 0 mV.

397           To get the somatic and dendritic maximum depolarization from the voltage traces, the  
398 baseline trace (`weight = 0`) is subtracted from the trace recorded in the presence of the input. To  
399 get the attenuation ratio the maximum value of the somatic depolarization is divided by the  
400 maximum value of the dendritic depolarization.

401 To calculate the feature error scores the soma/dendrite attenuation values are first  
402 averaged over the distance ranges to be compared to the experimental data to get the feature Z-  
403 scores. The final score is the average of the feature error scores calculated at the different dendritic  
404 locations.

405

## 406 **The Oblique Integration Test**

407

408 This test evaluates the signal integration properties of radial oblique dendrites,  
409 determined by providing an increasing number of synchronous (0.1 ms between inputs) or  
410 asynchronous (2 ms between inputs) clustered synaptic inputs. The experimental mean and  
411 standard error (SE) of the features examined are available in the paper of Losonczy and Magee  
412 [32] and are read from a JSON file into the *observation* dictionary of the test. The SE values  
413 are then converted to standard deviation values. The following features are tested: voltage  
414 threshold for dendritic spike initiation (defined as the expected somatic depolarization at which a  
415 step-like increase in peak  $dV/dt$  occurs); proximal threshold (defined the same way as above, but  
416 including only those results in the statistics where the proximal part of the examined dendrite was  
417 stimulated); distal threshold; degree of nonlinearity at threshold; suprathreshold degree of  
418 nonlinearity; peak derivative of somatic voltage at threshold; peak amplitude of somatic EPSP; time  
419 to peak of somatic EPSP; degree of nonlinearity in the case of asynchronous inputs.

420 The test automatically selects a list of oblique dendrites that meet the criteria of the  
421 experimental protocol, based on a section list containing the oblique dendritic sections (this can  
422 either be provided by the HOC model, or generated automatically if the  
423 `find_section_lists` variable of the `ModelLoader` is set to `True` – see the section ‘Classify  
424 apical sections of pyramidal cells’ below). For each selected oblique dendrite a proximal and a

425 distal location is examined. The criteria for the selection of dendrites, which were also applied  
426 in the experiments, are the following. The selected oblique dendrites should be terminal  
427 dendrites (they have no child sections) and they should be at most 120  $\mu\text{m}$  from the soma. This  
428 latter criterion can be changed by the user by changing the value of the `ModelLoader`'s  
429 `max_dist_from_soma` variable, and it can also increase automatically if needed. In particular,  
430 if no appropriate oblique is found up to the upper bound provided, the distance is increased  
431 iteratively by 15  $\mu\text{m}$ , but not further than 190  $\mu\text{m}$ .

432 Then an increasing number of synaptic inputs are activated at the selected dendritic  
433 locations separately, while recording the local and somatic voltage response. `HippoUnit`  
434 provides a default synapse model to be used in the `ObliqueIntegrationTest`. If the  
435 `AMPA_name`, and `NMDA_name` variables are not set by the user, the default synapse is used. In  
436 this case the AMPA component of the synapse is given by the built-in `Exp2Syn` synapse of  
437 `NEURON`, while the NMDA component is defined in an NMODL (.mod) file which is part of  
438 the `HippoUnit` package. This NMDA receptor model uses a Jahr-Stevens voltage dependence  
439 [45] and rise and decay time constants of 3.3 and 102.38 ms, respectively. The time constant  
440 values used here are temperature- (Q10-) corrected values from [41]. Q10 values for the rise  
441 and decay time constants were 2.2 [46] and 1.7 [47], respectively. The model's own AMPA  
442 and NMDA receptor models can also be used in this test if their NMODL files are available  
443 and compiled among the other mechanisms of the model. In this case the `AMPA_name`, and  
444 `NMDA_name` variables need to be provided by the user. The time constants of the built-in  
445 `Exp2Syn` AMPA component and the AMPA/NMDA ratio can be adjusted by the user by setting  
446 the `AMPA_tau1`, `AMPA_tau2` and `AMPA_NMDA_ratio` parameter of the `ModelLoader`. The  
447 default AMPA/NMDA ratio is 2.0 from [41], and the default `AMPA_tau1` and `AMPA_tau2` are  
448 0.1 ms and 2.0 ms, respectively [28,29].

449 To test the Poirazi et al. 2003 model using its own receptor models, we also had to  
450 implement a modified version of the synapse functions of the `ModelLoader` that can deal with  
451 the different (pointer-based) implementation of synaptic activation in this model. For this  
452 purpose, a child class was implemented that inherits from the `ModelLoader` class. This  
453 modified version is not part of the official HippoUnit version, but is available here:  
454 [https://github.com/KaliLab/HippoUnit\\_demo/blob/master/ModelLoader\\_Poirazi\\_2003\\_CA1.](https://github.com/KaliLab/HippoUnit_demo/blob/master/ModelLoader_Poirazi_2003_CA1.py)  
455 [py](https://github.com/KaliLab/HippoUnit_demo/blob/master/ModelLoader_Poirazi_2003_CA1.py).

456 The synaptic weights for each selected dendritic location are automatically adjusted by  
457 the test using a binary search algorithm so that the threshold for dendritic spike generation is 5  
458 synchronous inputs – which was the average number of inputs that had to be activated by  
459 glutamate uncaging to evoke a dendritic spike in the experiments [32]. This search runs in  
460 parallel for all selected dendritic locations. The search interval of the binary search and the  
461 initial step size of the searching range can be adjusted by the user through the `c_minmax` and  
462 `c_step_start` variables of the `ModelLoader`. During the iterations of the algorithm the step  
463 size may decrease if needed; a lower threshold for the step size (`c_step_stop` variable of the  
464 `ModelLoader`) must be set to avoid infinite looping. Those dendritic locations where this first  
465 dendritic spike generates a somatic action potential, or where no dendritic spike can be evoked, are  
466 excluded from further analysis. To let the user know, this information is displayed on the output  
467 and also printed into the log file saved by the test. Most of the features above are extracted at the  
468 threshold input level (5 inputs).

469 The final score of this test is the average of the feature error scores achieved by the model  
470 for the different features; however, a T-test analysis is also available as a separate score type for  
471 this test.

472

## 473 **Parallel computing**

474

475 Most of the tests of HippoUnit require multiple simulations of the same model, either  
476 using stimuli of different intensities or at different locations in the cell. To run these simulations  
477 in parallel and save time, the Python `multiprocessing.Pool` module is used. The size of  
478 the pool can be set by the user. Moreover, all NEURON simulations are performed in  
479 multiprocessing pools to ensure that they run independently of each other, and to make it easy  
480 to erase the models after the process has finished. This is especially important in the case of  
481 HOC templates in order to avoid previously loaded templates running in the background and  
482 the occurrence of ‘Template cannot be redefined’ errors when the same model template is  
483 loaded again.

484

## 485 **Classifying the apical sections of pyramidal cells**

486

487 Some of the validation tests of HippoUnit require lists of sections belonging to the  
488 different dendritic types of the apical tree (main apical trunk, apical tuft dendrites, radial oblique  
489 dendrites). To classify the dendrites NeuroM [48] is used as a base package. NeuroM contains  
490 a script that, starting from the tuft (uppermost dendritic branches in Fig 1) endpoints, iterates  
491 down the tree to find a single common ancestor. This is considered as the apical point. The  
492 apical point is the upper end of the main apical dendrite (trunk), from where the tuft region  
493 arises. Every dendrite branching from the trunk below this point is considered an oblique  
494 dendrite.

495 However, there are many CA1 pyramidal cell morphologies where the trunk bifurcates  
496 close to the soma to form two or even more branches. In these cases the method described above

497 finds this proximal bifurcation point as the apical point (see Fig 1A). To overcome this issue,  
498 we worked out and implemented a method to find multiple apical points by iterating the  
499 function provided by NeuroM. In particular, if the initial apical point is closer to the soma than  
500 a pre-defined threshold, the function is run again on subtrees of the apical tree where the root  
501 node of the subtree is the previously found apical point, to find apical points on those subtrees  
502 (see Fig 1B). When (possibly after multiple iterations) apical points that are far enough from  
503 the soma are found, NeuroM is used to iterate down from them on the parent sections, which  
504 will be the trunk sections (blue dots in Fig 1C). Iterating up, the tuft sections are found (green  
505 dots in Fig 1C), and the other descendants of the trunk sections are considered to be oblique  
506 dendrites (yellow dots in Fig 1C). Once all the sections are classified, their NeuroM coordinates  
507 are converted to NEURON section information for further use.  
508

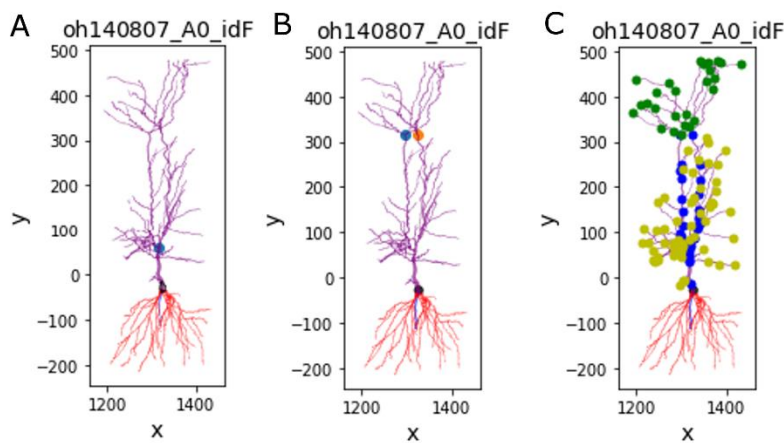

509  
510 Fig 1: Classifying the apical dendrites of pyramidal cells. Morphological reconstruction made within the HBP at  
511 University College London (UCL). (A) The original method of NeuroM finds a single apical point which is actually  
512 a bifurcation of the trunk. (B) Further developing the method, multiple apical points can be found. (C)The apical  
513 dendritic sections are classified. Blue: trunk, yellow: oblique dendrites, green: tuft sections.  
514

515           We note that this function can only be used for hoc models that load their morphologies  
516 from a separate morphology file (e.g., ASC, SWC) as NeuroM can only deal with morphologies  
517 provided in these standard formats. For models with NEURON morphologies implemented  
518 directly in the hoc language, the SectionLists required by a given test should be implemented  
519 within the model.

520

## 521 **Models from literature**

522

523           In this paper we demonstrate the utility of the HippoUnit validation test suite by  
524 applying its tests to validate and compare the behavior of several different detailed hippocampal  
525 CA1 pyramidal cell models available on ModelDB [17]. For this initial comparison we chose  
526 models published by several modeling groups worldwide that were originally developed for  
527 various purposes.

528           The Golding et al., 2001 model [26] (ModelDB accession number: 64167) was  
529 developed to show the dichotomy of the back-propagation efficacy and the amplitudes of the  
530 back-propagating action potentials at distal trunk regions in CA1 pyramidal cells and to make  
531 predictions on the possible causes of this behavior. It contains only the most important ion  
532 channels (Na,  $K_{DR}$ ,  $K_A$ ) needed to reproduce the generation and propagation of action  
533 potentials. Here we tested three different versions of the model: the ones corresponding to  
534 Figure 8A, Figure 8B and Figure 9B of the paper [26].

535           The Katz et al., 2009 model [49] (ModelDB accession number: 127351) is based on the  
536 Golding et al. 2001 model and was built to investigate the functional consequences of the  
537 distribution of strength and density of synapses on the apical dendrites that they observed  
538 experimentally, for the mode of dendritic integration.

539 The Migliore et al., 2011 model [50] (ModelDB accession number: 138205) was used  
540 to study schizophrenic behavior. It is based on earlier models of the same modeling group,  
541 which were used to investigate the initiation and propagation of action potentials in oblique  
542 dendrites, and have been validated against different electrophysiological data.

543 The Poirazi et al., 2003 model [6,51] (ModelDB accession number: 20212) was  
544 designed to clarify the issues about the integrative properties of thin apical dendrites that may  
545 arise from the different and sometimes conflicting interpretations of available experimental  
546 data. This is a quite complex model in the sense that it contains a large number of different  
547 types of ion channels, whose properties were adjusted to fit in vitro experimental data, and it  
548 also contains four types of synaptic receptors.

549 The Bianchi et al., 2012 model [24] (ModelDB accession number: 143719) was  
550 designed to investigate the mechanisms behind depolarization block observed experimentally  
551 in the somatic spiking behavior of CA1 pyramidal cells. It was developed by combining and  
552 modifying the Shah et al., 2008 [52] and the Poirazi et al. 2003 models [6,51]. The former of  
553 these was developed to show the significance of axonal M-type potassium channels.

554 The Gómez González et al., 2011 [53] model (ModelDB accession number: 144450) is  
555 based on the Poirazi et al. 2003 model and it was modified to replicate the experimental data of  
556 [32] on the nonlinear signal integration of radial oblique dendrites when the inputs arrive in a  
557 short time window. The model was adjusted to five different detailed morphologies.

558 Models from literature that are published on ModelDB typically implement their own  
559 simulations and plots to make it easier for users and readers to reproduce and visualize the  
560 results shown in the corresponding paper. Therefore, to be able to test the models described  
561 above using our test suite, we needed to create standalone versions of them. These standalone  
562 versions do not display any GUI, or contain any built-in simulations and run-time  
563 modifications, but otherwise their behavior should be identical to the published version of the



564 models. We also added section lists of the radial oblique and the trunk dendritic sections to  
565 those models where this was not done yet, as some of the tests require these lists. To ensure that  
566 the standalone versions have the same properties as the original models, we checked their  
567 parameters after running their built-in simulations (in case including any run-time  
568 modifications), and made sure they match the parameters of the standalone version. We also  
569 asked the developers of the models to check the standalone versions and give us feedback;  
570 however, we received substantial feedback only from the developers of the Migliore et al. 2011  
571 and the Bianchi et al., 2012 models, which were positive. The modified models used for running  
572 validation tests are available in this GitHub repository:  
573 [https://github.com/KaliLab/HippoUnit\\_demo](https://github.com/KaliLab/HippoUnit_demo).

## 574 **Results**

### 575 **The HippoUnit validation suite**

576

577 HippoUnit (<https://github.com/KaliLab/hippounit>) is an open source test suite for the  
578 automatic and quantitative evaluation and validation of the behavior of neural single cell  
579 models. The tests of HippoUnit automatically perform simulations that mimic common  
580 electrophysiological protocols on neuronal models to compare their behavior with quantitative  
581 experimental data using various feature-based error functions. Current validation tests cover  
582 somatic (subthreshold and spiking) behavior as well as signal propagation and integration in  
583 the dendrites. The tests were developed using data and models for rat hippocampal CA1  
584 pyramidal cells. However, most of the tests are directly applicable to or can be adapted for other  
585 cell types if the necessary experimental data are available; examples of this will be presented  
586 in later sections.

587 HippoUnit is implemented in the Python programming language, and is based on the  
588 SciUnit [18] framework for testing scientific models. The current version of HippoUnit is  
589 capable of handling single cell models implemented in the NEURON simulator. As a result, by  
590 adapting and using the example Jupyter notebooks described in S1 Appendix, the tests of  
591 HippoUnit can be run on neural models that are built in the NEURON simulator software,  
592 without any further coding required from the user. In principle, neural models developed using  
593 other software tools can also be tested by HippoUnit; however, this requires the re-  
594 implementation by the user of the interface functions that allow HippoUnit to run the necessary  
595 simulations and record their output (see the Methods section for more details).

596 In the current tests of HippoUnit, once all the necessary simulations have been  
597 performed and the responses of the model have been recorded, electrophysiological features are  
598 extracted from the voltage traces, and the discrepancy between the model's behavior and the  
599 experiment is computed by comparing the feature values with those extracted from the  
600 experimental data (see Methods). For simplicity, we refer to the result of this comparison as the  
601 feature error; however, we note that there are many possible sources of such discrepancy  
602 including, among others, experimental artefacts and noise, shortcomings of the models, and  
603 differences between the conditions assumed by the models and those in the actual experiments  
604 (see the Discussion for more details). The final score of a given test achieved by a given model  
605 is given by the average (or, in some cases, the sum) of the feature error scores for all the features  
606 evaluated by the test.

607 Besides the final score, which is the basic output of all the tests, the tests of HippoUnit  
608 typically provide a number of other useful outputs (see Methods), including figures that  
609 visualize the model's behavior through traces and plot the feature and error values compared to  
610 the experimental data. It is always strongly recommended to look at the traces and other figures  
611 to get a fuller picture of the model's response to the stimuli, which helps with the correct

612 interpretation of validation results. Such closer inspection also makes it possible to detect  
613 possible test failures, when the extraction of certain features does not work correctly for a given  
614 model.

615 HippoUnit can also take advantage of the parallel execution capabilities of modern  
616 computers. When tests require multiple simulations of the same model using different settings  
617 (e.g., different stimulation intensities or different stimulus locations in the cell), these  
618 simulations are run in parallel, which can make the validation process substantially faster,  
619 depending on the available computing resources.

620 One convenient way of running a test on a model is to use an interactive computational  
621 notebook, such as the Jupyter Notebook [54], which enables the combination of program codes  
622 to be run (we used Python code to access the functionality of HippoUnit), the resulting outputs  
623 (e.g. figures, tables, text) and commentary or explanatory text in a single document. Therefore,  
624 we demonstrate the usage of HippoUnit through this method (See S1 Appendix and  
625 [https://github.com/KaliLab/HippoUnit\\_demo](https://github.com/KaliLab/HippoUnit_demo)).

626

## 627 **Comparison of the behavior of rat hippocampal CA1 pyramidal cell models** 628 **selected from the literature**

629

630 We selected six different publications containing models of hippocampal CA1  
631 pyramidal cells whose implementations for the NEURON simulator were available in the  
632 ModelDB database. Our aim was to compare the behavior of every model to the experimental  
633 target data using the tests of HippoUnit, which also allowed us to compare the models to each  
634 other, and to test their generalization performance in paradigms that they were not originally  
635 designed to capture. These models differ in their complexity regarding the number and types of

636 ion channels that they contain, and they were built for different purposes (see the Methods  
637 section for more details on the models). A common property of these models is that their  
638 parameters were set using manual procedures with the aim of reproducing the behavior of real  
639 CA1 PCs in one or a few specific paradigms. As some of them were built by modifying and  
640 further developing previous models, these share the same morphology (see Fig. 2). On the other  
641 hand, the model of Gómez González et al. 2011 was adjusted to 5 different morphologies, which  
642 were all tested. In the case of the Golding et al. 2001 model, we tested three different versions  
643 (shown in Figures 8A, 8B and 9A of the corresponding paper [26]) that differ in the distribution  
644 of the sodium and the A-type potassium channels, and therefore the back-propagation efficacy  
645 of the action potentials. The morphologies and characteristic voltage responses of all the models  
646 used in this comparison are displayed in Fig 2.

647

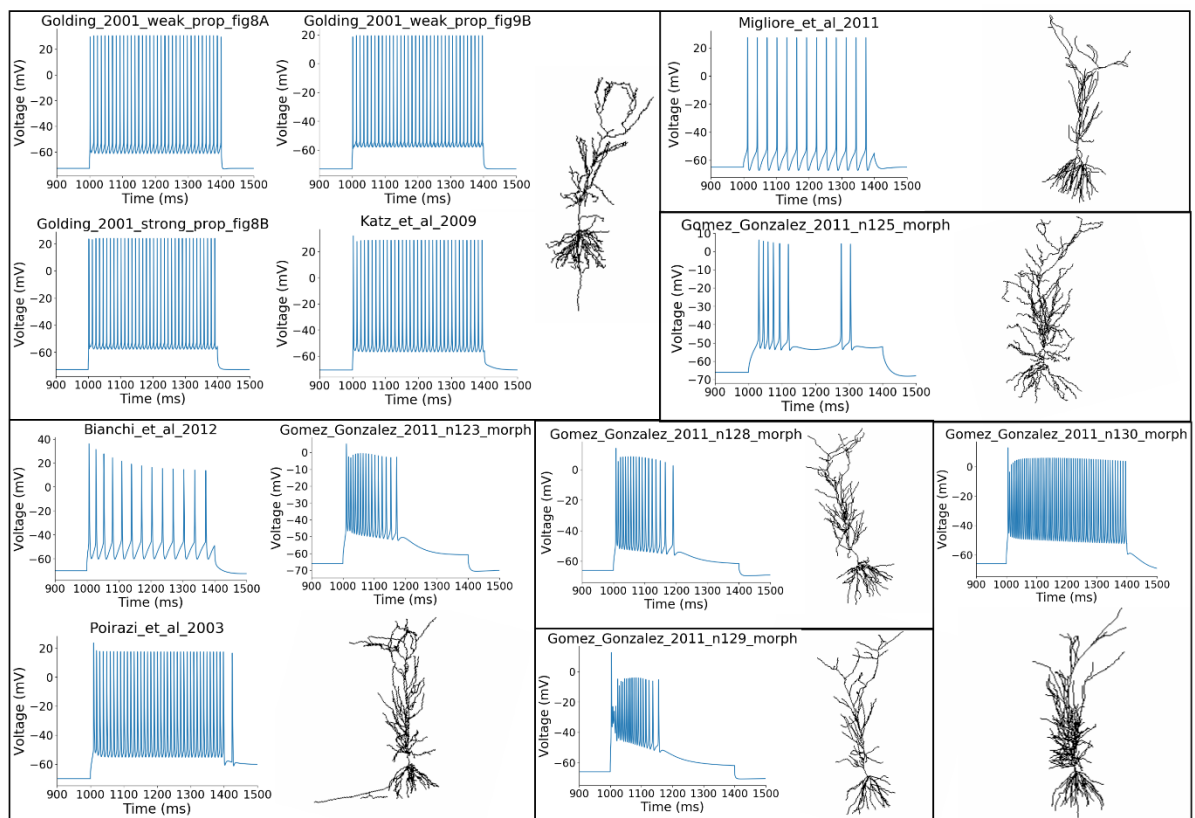

648

649 Fig 2: The morphologies of the different models tested and their voltage responses to a 400 ms step current  
650 injection of 0.6 nA amplitude.

651

652 Running the tests of HippoUnit on these models we took into account the original  
653 settings of the simulations of the models, and set the `v_init` (the initial voltage when the  
654 simulation starts), and the `celsius` (the temperature at which the simulation is done) variables  
655 accordingly. For the Bianchi et al 2012 model we used variable time step integration during all  
656 the simulations, as it was done in the original modeling study. For the other models a fixed time  
657 step were used (`dt=0.025 ms`).

658

## 659 **Somatic Features Test**

660

661 Using the Somatic Features Test of HippoUnit, we compared the behavior of the models  
662 to both patch clamp recordings (patch clamp dataset) and sharp electrode recordings (sharp  
663 electrode dataset). To see how representative these datasets are of the literature as a whole we  
664 first compared some of the features extracted from these datasets to data available on  
665 Neuroelectro.org [36] and on Hippocampome.org [37]. We also performed a more specific  
666 review of the relevant literature to compare the most important somatic features of our patch  
667 clamp dataset to results from published patch clamp recordings [38–43] (see Methods). We  
668 conclude that the patch clamp dataset is in good agreement with experimental observations  
669 available in the literature, and will be used as a representative example in this study.

670 The two datasets used in this study (sharp electrode dataset, patch clamp dataset) differ  
671 not only in the recording technique, but also in the simulation protocol. In the sharp electrode  
672 recordings, the cells received 400 ms-long depolarizing and hyperpolarizing current injections,

673 using amplitudes of 0.2, 0.4, 0.6, 0.8 and 1.0 nA in both directions. In the patch clamp  
674 recordings, both the depolarizing and the hyperpolarizing current injections were 300 ms long  
675 and 0.05, 0.1, 0.15, 0.2, 0.25 nA in amplitude.

676 As each of the tested models apparently used experimental data obtained from patch  
677 clamp recordings as a reference, here we show the detailed results of the test on the models  
678 when their output was compared to the features extracted from the patch clamp data (we will  
679 return to the comparison between the two datasets near the end of this section). During these  
680 recordings the cells were stimulated with relatively low amplitude current injections. Some of  
681 the examined models (Migliore et al. 2011, Gómez González et al. 2011 n125 morphology) did  
682 not fire even for the highest amplitude tested. Some other models started to fire for higher  
683 current intensities than it was observed experimentally. In these cases the features that describe  
684 action potential shape or timing properties cannot be evaluated for the given model (for the  
685 current amplitudes affected). Therefore, besides the final score achieved by the models on this  
686 test (the average Z-score for the successfully evaluated features – see Methods for details), we  
687 also consider the proportion of the successfully evaluated features as an important measure of  
688 how closely the model matches this specific experimental dataset (Fig 4B).

689 Fig 3 shows how the extracted feature values of the somatic response traces of the  
690 different models fit the experimental values. It is clear that the behavior of the different models  
691 is very diverse. Each model captures some of the experimental features but shows a larger  
692 discrepancy for others.

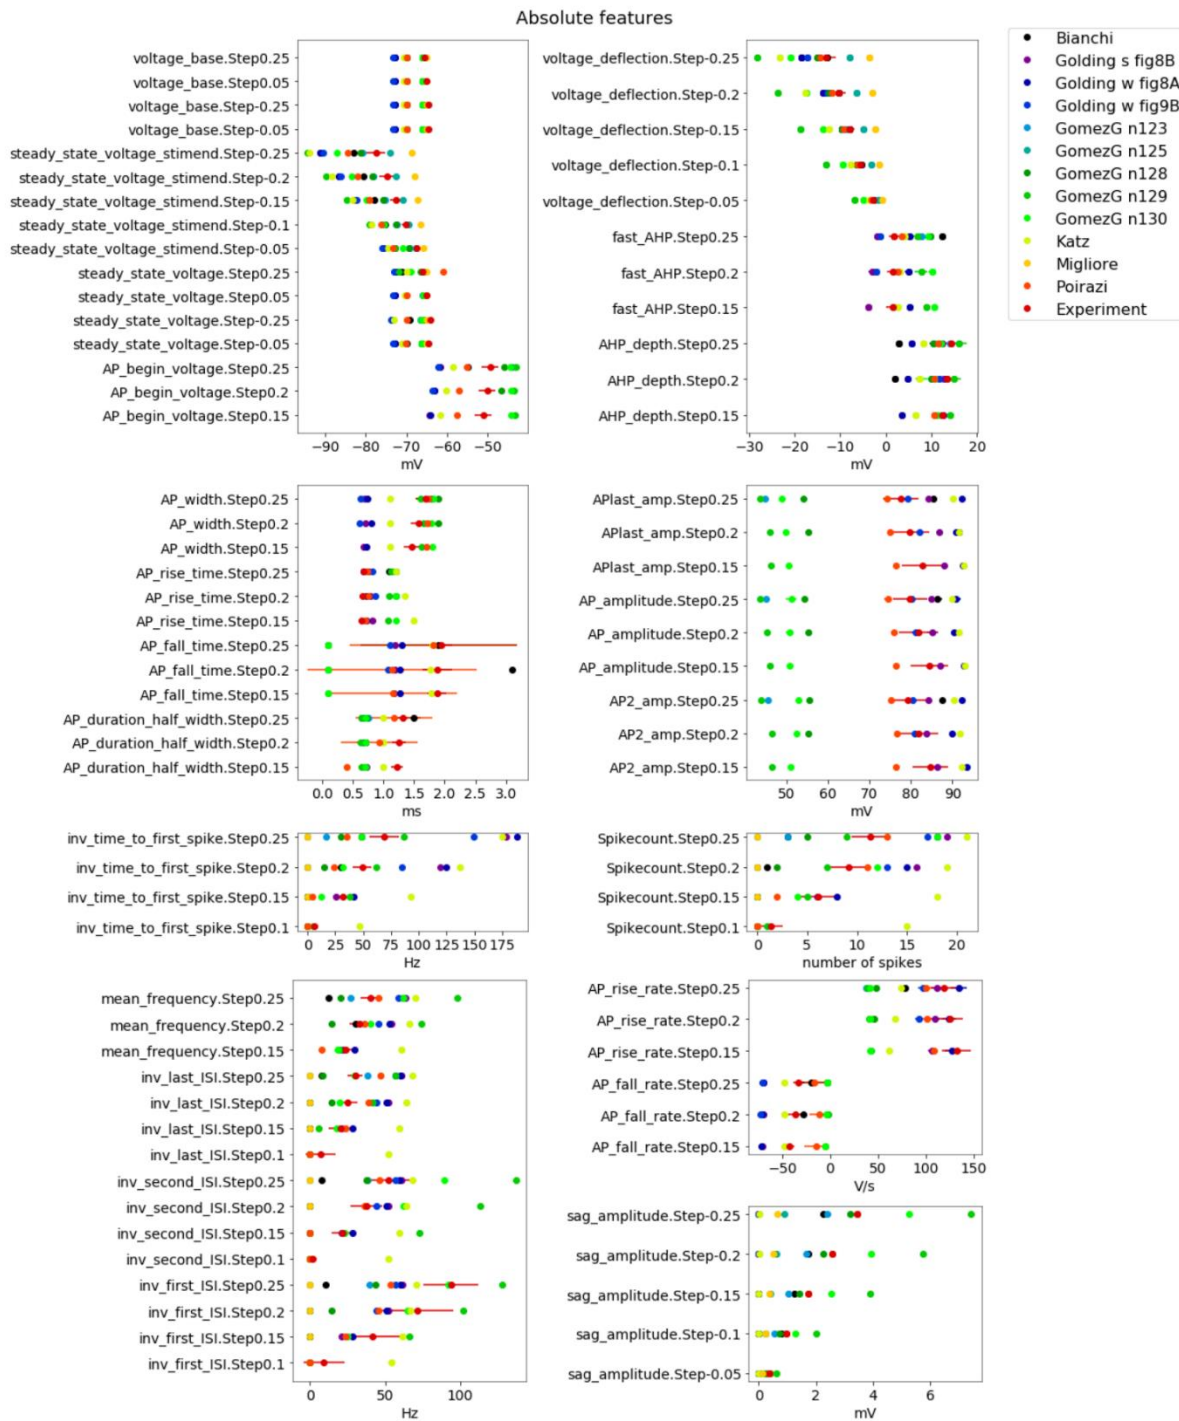

693

694 Fig 3: Feature values from the Somatic Features Test of HippoUnit applied to several published models. Absolute  
 695 feature values extracted from the voltage responses of the models to somatic current injections of varying  
 696 amplitude, compared to experimental values (darkest red) that were extracted from the patch clamp dataset . (Not  
 697 all the evaluated features are shown here.)

698

699           The resting membrane potential (*voltage\_base*) for all of the models was apparently  
700 adjusted to a more hyperpolarized value than in the experimental recordings we used for our  
701 comparison, and most of the models also return to a lower voltage value after the step stimuli  
702 (*steady\_state\_voltage*). An exception is the Poirazi et al. 2003 model, where the decay time  
703 constant after the stimulus is unusually high (data not shown in Fig 3, but the slow decay can  
704 be seen in the example trace in Fig 2.). The voltage threshold for action potential generation  
705 (*AP\_begin\_voltage*) is lower than the experimental value for most of the models (that were able  
706 to generate action potentials in response to the examined current intensities), but it is higher  
707 than the experimental value for most versions of the Gómez González et al. 2011 model. For  
708 negative current steps most of the models gets more hyperpolarized (*voltage\_deflection*) (the  
709 most extreme is the Gómez González et al. 2011 model with the n129 morphology), while the  
710 Gómez González et al. 2011 model with the n125 morphology and the Migliore et al. 2011  
711 model get less hyperpolarized than it was observed experimentally. The sag amplitudes are also  
712 quite high for the Gómez González et al. 2011 n129, and n130 models, while the Katz et al.  
713 2009, and all versions of the Golding et al. 2001 models basically have no hyperpolarizing sag.

714           It is quite conspicuous how much the amplitude of the action potentials (*APlast\_amp*,  
715 *AP\_amplitude*, *AP2\_amp*) differs in the Gómez González et al. 2011 models from the  
716 experimental values and from the other models as well. The Katz et al. 2009 and one of the  
717 versions (Fig 8A) of the Golding et al. 2001 model have slightly too high action potential  
718 amplitudes, and these models have relatively small action potential width (*AP\_width*). On the  
719 other hand, the rising phase (*AP\_rise\_time*, *AP\_rise\_rate*) of the Katz et al. 2009 model appears  
720 to be too slow.

721           Looking at the inverse interspike interval (*ISI*) values, it can be seen that the  
722 experimental spike trains show adaptation in the ISIs, meaning that the first ISI is smaller (the  
723 inverse ISI is higher) than the last ISI for the same current injection amplitude. This behavior



724 can be observed in the case of the Katz et al. 2009 model, three versions (n128, n129, n130  
725 morphology) of the Gómez González et al. 2011 model, but cannot really be seen in the Bianchi  
726 et al. 2011, the Poirazi et al. 2003 and the three versions of the Golding et al. 2001 models. At  
727 first look it may seem contradictory that in the case of the Gómez González et al. 2011 model  
728 version n129 morphology the spike counts are quite low, while the mean frequency and the  
729 inverse ISI values are high. This is because the soma of this model does not fire over the whole  
730 period of the stimulation, but starts firing at higher frequencies, then stops firing for rest of the  
731 currently used (relative short) stimulus (see Fig 2), although it would start firing again for longer  
732 current injections (data not shown). The Katz et al. 2009 model fires quite a high number of  
733 action potentials (*Spikecount*) compared to the experimental data, at a high frequency.

734 In the experimental recordings there is a delay before the first action potential is  
735 generated, which becomes shorter with increasing current intensity (indicated by the  
736 *inv\_time\_to\_first\_spike* feature that becomes larger with increasing input intensity). In most of  
737 the models this behavior can be observed, albeit to different degrees. The Katz et al. 2009 model  
738 has the shortest delays (highest *inv\_time\_to\_first\_spike* values), but the effect is still visible.

739 To quantify the difference between the experimental dataset and the simulated output of  
740 the models, these were compared using the feature-based error function (Z-Score) described  
741 above to calculate the feature errors. Fig 4A shows the mean error scores of the model features  
742 whose absolute values are illustrated in Fig 3 (averaged over the different current step  
743 amplitudes examined). From this figure it is even more clearly visible that each model fits some  
744 experimental features well but does not capture others. For example, it is quite noticeable in Fig  
745 4A that most of the versions of the Gómez González et al. 2011 model (greenish dots) perform  
746 well for features describing action potential timing (upper part of the figure, e.g., *ISIs*,  
747 *mean\_frequency*, *spikecount*), but get higher error scores for features of action potential shape  
748 (lower part of the figure, e.g., *AP\_rise\_rate*, *AP\_rise\_time*, *AP\_fall\_rate*, *AP\_fall\_time*, *AP*

749 *amplitudes*). Conversely, the Katz et al. 2009 model achieved better scores for AP shape  
 750 features than for features describing AP timing. It is also worth noting that none of the error  
 751 scores for the model of Migliore et al. 2011 was higher than 4; however, looking at Fig 4B it  
 752 can be seen that less than half of the experimental features were successfully evaluated in this  
 753 model, which is because it does not fire action potentials for the current injection amplitudes  
 754 examined here.  
 755

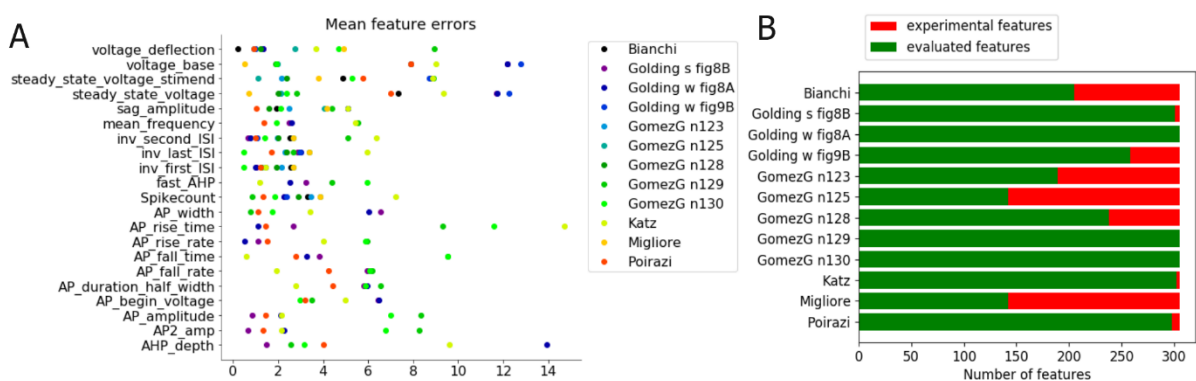

756  
 757 Fig 4: Evaluation of results from the Somatic Features Test of HippoUnit applied to published models. (A) Mean  
 758 feature errors (in units of the experimental SD) of the different models. Feature error values are averaged over the  
 759 different input step amplitudes. (B) The bars represent the number of features that were attempted to be evaluated  
 760 for the models (i.e., the number of features extracted from the experimental patch clamp dataset). The number of  
 761 successfully evaluated features for the various models is shown in green, and the number of features that could not  
 762 be evaluated for a particular model is shown in red.

763  
 764 Besides enabling the comparison of different models regarding how well they match a  
 765 particular dataset, the tests of HippoUnit also allow one to determine the match between a  
 766 particular model and several datasets of the same type. As experimental results can be heavily  
 767 influenced by recording conditions and protocols, and also depend on factors such as the strain,  
 768 age, and sex of the animal, it is important to find out whether the same model can  
 769 simultaneously capture the outcome of different experiments, and if not, how closely it is able

770 to match the different datasets. As a practically relevant example, we looked at how well the  
771 various published models that we were testing captured a different experimental dataset that  
772 also contained current clamp recordings from rat CA1 PCs, but which was obtained using sharp  
773 electrodes rather than the whole-cell patch clamp technique [3]. We therefore evaluated all the  
774 models with the Somatic Features Test of HippoUnit using both datasets, and then compared  
775 the results.

776         When we simply compared the raw outputs of the test for each model evaluated using  
777 the two different data sets (Fig 5A) we identified two factors that substantially bias the results.  
778 First, we found that the standard deviation values for the features extracted from the two  
779 datasets are very different in magnitude; more specifically, the patch clamp recording data set  
780 had much lower standard deviation values for most of the features. This results in relatively  
781 higher feature error scores achieved by the models, as the difference of the model output from  
782 the experimental features is given in the unit of the experimental standard deviation. The other  
783 source of bias is that not all the features could be extracted from both of the data sets, and, as  
784 mentioned before, not the same current step protocol (current intensity, duration) was used  
785 during the different experiments. Consequently, the models are not compared to exactly the  
786 same set of features in the two cases. Mainly as a result of these two confounding factors,  
787 comparison of the raw scores of the models for the two data sets (Fig 5A) appears to indicate  
788 that most models fit the dataset obtained from sharp electrode recordings better, even though  
789 these models were typically built mostly based on patch clamp data.

790

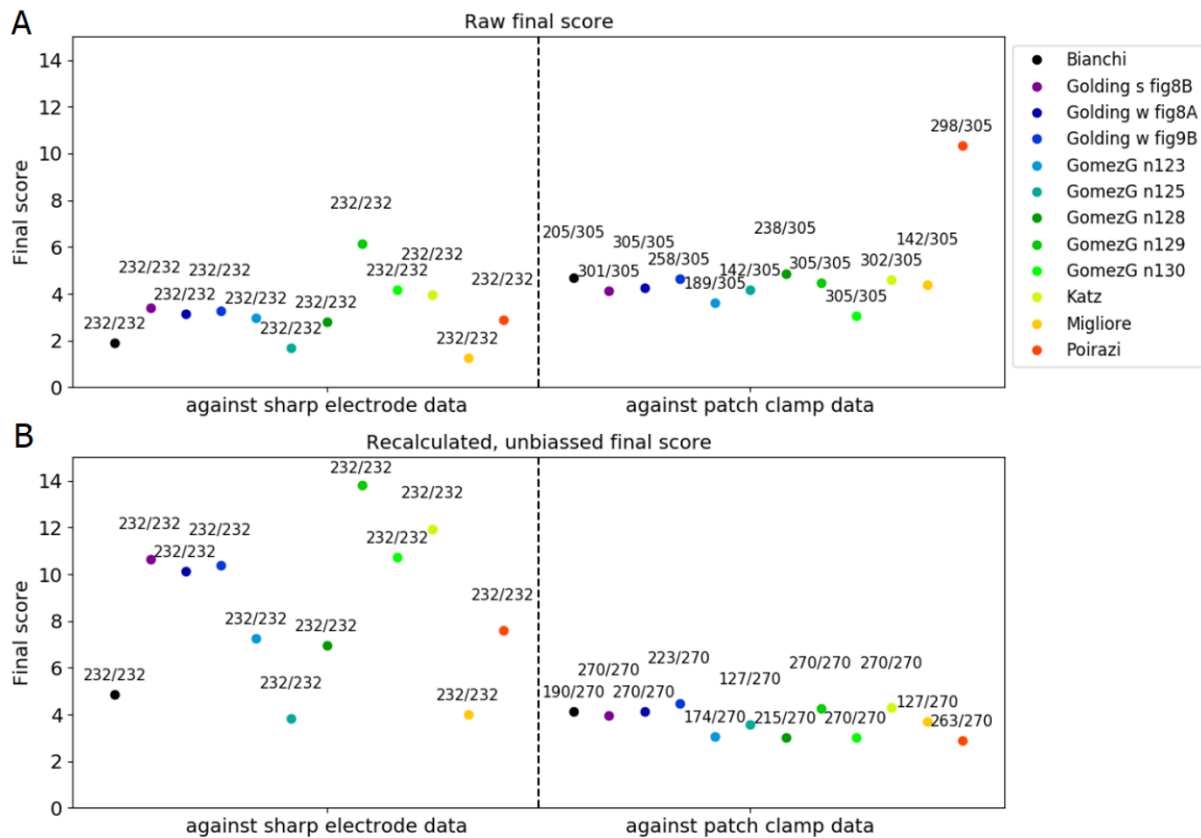

791  
 792 Fig 5: Comparison of the final scores achieved by the different models on the Somatic Features Test against  
 793 validation data from two different datasets (sharp electrode data, patch clamp data). In the upper panel (A) the raw  
 794 output of the tests is shown, while in the lower panel (B) the feature errors and the final scores have been  
 795 recalculated using standardized standard deviation values. Numbers above each data point show the proportion of  
 796 the successfully evaluated features compared to the number of features attempted to be evaluated (successfully  
 797 extracted from the data set). Note that while in the recalculated final scores (B) only those eFEL features were  
 798 taken into account that could be extracted from both datasets, they are extracted for different current step  
 799 amplitudes, which accounts for the difference in the number of observation features for the two datasets.

800  
 801 To overcome these issues and make unbiased comparisons of the models to the two  
 802 datasets, the feature error scores and the final scores were recalculated in the following way  
 803 (Fig 5B). The new feature error scores for the two different data sets were calculated as the  
 804 difference of the model's feature value from the mean feature value of each dataset (as before),  
 805 but divided by a common standard deviation value. This standardized SD value for each eFEL

806 feature was the mean of the standard deviation values over the current steps in the patch clamp  
807 dataset (the results were qualitatively similar if we used the SD values from the sharp electrode  
808 dataset everywhere instead). Averaging the standard deviation values of the eFEL features over  
809 the current steps was required because the current step amplitudes were not the same in the two  
810 data sets, and we therefore needed to define SD values that were independent of the amplitude.  
811 To get rid of the second bias, only those eFEL features were used in the final score recalculation  
812 that are present in both observations (sharp electrode and patch clamp datasets) for at least one  
813 current step amplitude. (This change had the side effect of significantly decreasing the final  
814 score for the Poirazi et al. 2003 model because the feature *decay\_time\_constant\_after\_stim* was  
815 excluded here, as it could not be extracted from the sharp electrode data.) Now that the final  
816 scores are recalculated to get rid of most of the biasing factors, it becomes clear that the somatic  
817 behavior of every model fits the patch clamp data better (Fig 5B).

818         It is worth noting that one biasing factor still remains in the last comparison: as it has  
819 already been mentioned, not all the observation features can be evaluated for each of the models,  
820 especially when they are compared to the patch clamp data set, which uses smaller currents. To  
821 allow the assessment of the potential effect of this issue, the proportion of the successfully  
822 evaluated features relative to the number of features attempted to be evaluated (successfully  
823 extracted from the data set) for each model is also shown in Fig 5 next to each data point.

824

## 825 **Depolarization Block Test**

826

827         In the Depolarization Block Test three features are evaluated. Two of them examine the  
828 threshold current intensity to reach depolarization block. The *I\_maxNumAP* feature is the  
829 current intensity at which the model fires the maximum number of action potentials, and the

830 *I\_below\_depol\_block* feature is the current intensity one step before the model enters  
831 depolarization block. Both are compared to the experimental  $I_{th}$  feature because, in the  
832 experiment [24], the number of spikes increased monotonically with increasing current  
833 intensity up to the current amplitude where the cell entered depolarization block during the  
834 stimulus, which led to a drop in the number of action potentials. By contrast, we experienced  
835 that some models started to fire fewer spikes for higher current intensities while still firing over  
836 the whole period of the current step stimulus, i.e., without entering depolarization block.  
837 Therefore, we introduced the two separate features for the threshold current. If these two feature  
838 values are not equal, a penalty is added to the score. The third evaluated feature is  $V_{eq}$ , the  
839 equilibrium potential during the depolarization block, which is calculated as the average of the  
840 membrane potential over the last 100 ms of a current pulse with amplitude 50 pA above  
841  $I_{maxNumAP}$  (or 50 pA above *I\_below\_depol\_block* if its value is not equal to  $I_{maxNumAP}$ ).  
842 Each model has a value for the “ $I_{maxNumAP}$ ” feature, while those models that do not enter  
843 depolarization block are not supposed to have a value for the *I\_below\_depol\_block* feature and  
844 the  $V_{eq}$  feature.

845         The results from applying the Depolarization Block Test to the models from ModelDB  
846 are shown in Fig 6. According to the test, four of the models entered depolarization block.  
847 However, by looking at the actual voltage traces provided by the test, it becomes apparent that  
848 only the Bianchi et al. 2011 model behaves correctly (which was developed to show this  
849 behavior). The other three models actually managed to “cheat” the test.

850

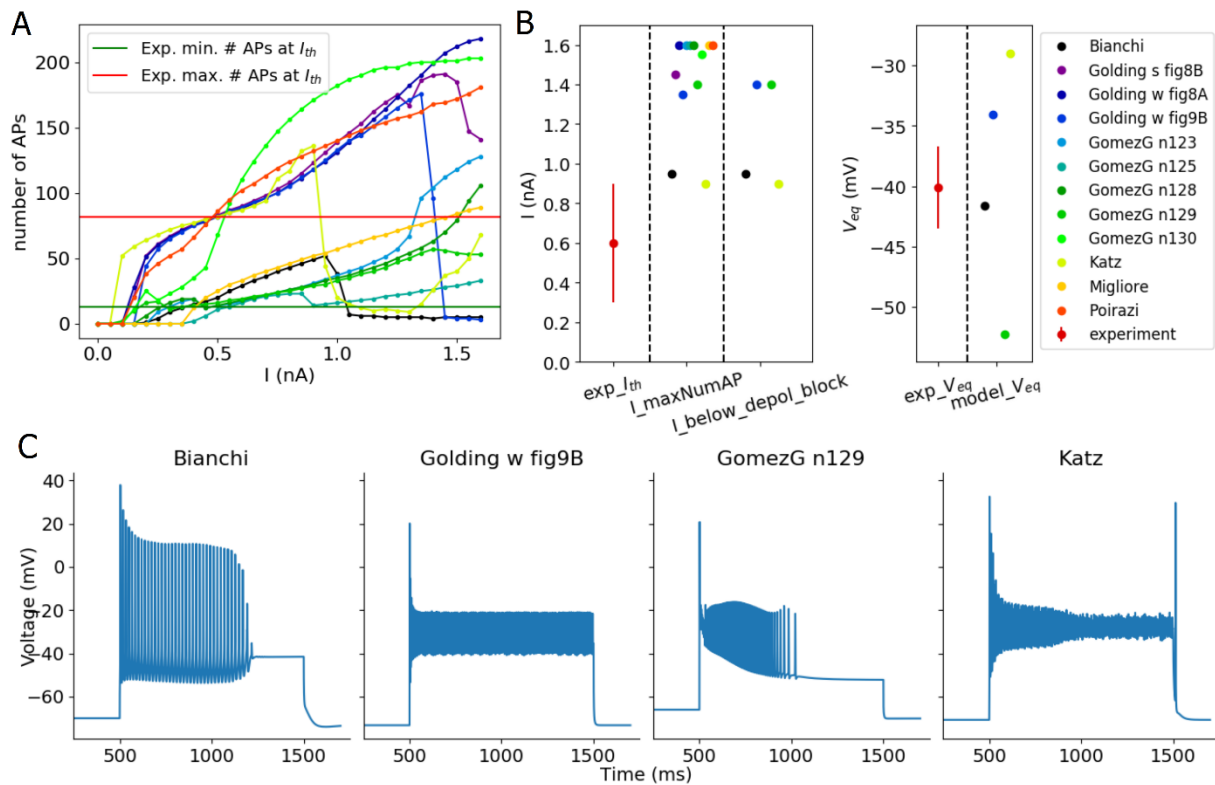

851

852 Fig 6: Results from the Depolarization Block Test of HippoUnit applied to published models. (A) Number of APs  
 853 fired by the models in response to current injections of increasing intensity. (B) Depolarization block feature values  
 854 extracted from the voltage responses of the models. (C) Voltage traces of different models that were recognized  
 855 by the test as depolarization block.

856

857 In the case of the Katz et al. 2009 and the Golding et al. 2001 Fig 9B models, the APs  
 858 get smaller and smaller with increasing stimulus amplitude until they get so small that they do  
 859 not reach the threshold for action potential detection; therefore, these APs are not counted by  
 860 the test and  $V_{eq}$  is also calculated. The Gómez González et al. 2011 model adjusted to the n129  
 861 morphology does not fire during the whole period of the current stimulation for a wide range  
 862 of current amplitudes (see Fig 2). Increasing the intensity of the current injection it fires an  
 863 increasing number of spikes, but always stops after a while before the end of the stimulus. On  
 864 the other hand, there is a certain current intensity after which the model starts to fire fewer  
 865 action potentials, and which is thus detected as  $I_{maxNumAP}$  by the test. Because no action

866 potentials can be detected during the last 100 ms of the somatic response one step above the  
867 detected “threshold” current intensity, the model is declared to have entered depolarization  
868 block, and a  $V_{eq}$  value is also extracted. These cases underline the importance of critically  
869 evaluating the full output of the tests rather than blindly accepting the final scores provided.  
870

## 871 **Back-propagating Action Potential Test**

872

873 This test first finds all the dendritic segments that belong to the main apical dendrite of  
874 the model and which are 50, 150, 250,  $350 \pm 20$   $\mu\text{m}$  from the soma, respectively. Then a train  
875 of action potentials of frequency around 15 Hz is triggered in the soma by injecting a step  
876 current of appropriate amplitude (as determined by the test), and the amplitudes of the first and  
877 last action potentials in the train are measured at the selected locations. In the Bianchi et al.  
878 2012 and the Poirazi et al. 2003 models (which share the same morphology, see Fig 2) no  
879 suitable trunk locations could be found in the most proximal ( $50 \pm 20$   $\mu\text{m}$ ) and most distal ( $350$   
880  $\pm 20$   $\mu\text{m}$ ) regions. This is because this morphology has quite long dendritic sections that are  
881 divided into a small number of segments. In particular, the first trunk section  
882 (apical\_dendrite[0]) originates from the soma, is 102.66  $\mu\text{m}$  long, and has only two segments.  
883 The center of one of them is 25.67  $\mu\text{m}$  far from the soma, while the other is already 77  $\mu\text{m}$  away  
884 from the soma. None of these segments belongs to the  $50 \pm 20$   $\mu\text{m}$  range, and therefore they are  
885 not selected by the test. The n123 morphology of the Gómez González et al. 2011 model has  
886 the same shape (Fig 2), but in this case the segments are different, and therefore it does not  
887 share the same problem.

888 At the remaining, successfully evaluated distance ranges in the apical trunk of the  
889 Bianchi et al. 2012 model, action potentials propagate very actively, barely attenuating. For the



890 *AP1\_amp* and *APlast\_amp* features at these distances, this model has the highest error score  
 891 (Fig 7), while the Poirazi et al. 2003 model performs quite well.

892

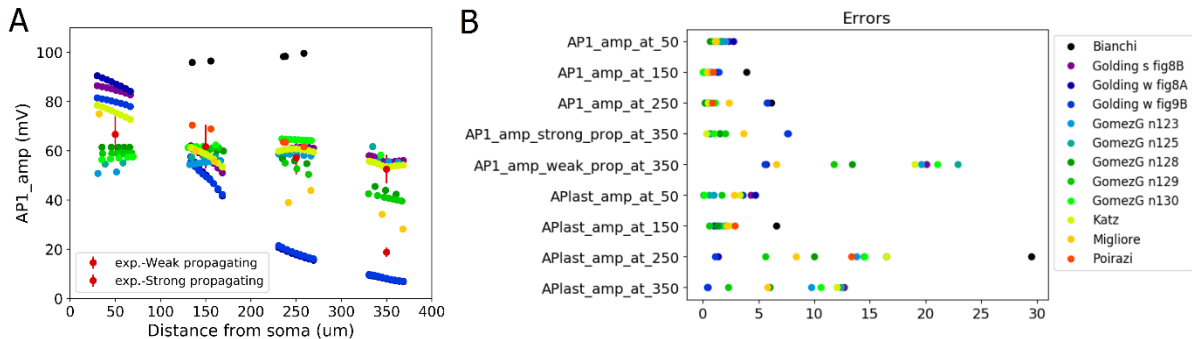

893

894 Fig 7: Results from the Back-propagating Action Potential Test of HippoUnit applied to published models. (A)  
 895 The amplitudes of the first back-propagating action potentials (in a train of spikes with frequency around 15 Hz)  
 896 as a function of recording location distance from the soma. (B) Feature error scores achieved by the different  
 897 models on the Back-propagating AP Test. The amplitudes of the first and last back-propagating action potentials  
 898 were averaged over the distance ranges of 50, 150, 250, 350  $\pm$   $\mu$ m and compared to the experimental features (see  
 899 Methods for more details).

900

901 The Golding et al. 2001 model was designed to investigate how the distribution of ion  
 902 channels can affect the back-propagation efficacy in the trunk. The two versions of the Golding  
 903 et al. 2001 model (“fig8A” and “fig9B” versions) which are supposed to be weakly propagating  
 904 according to the corresponding paper [26], are also weakly propagating according to the test.  
 905 However, the difference between their strongly and weakly propagating feature error scores is  
 906 not too large (Fig 7), which is probably caused by the much smaller standard deviation value  
 907 of the experimental data for the weakly propagating case. Although the amplitudes of the first  
 908 action potentials of these two models fit the experimental data relatively well, they start to  
 909 decline slightly closer to the soma than it was observed experimentally, as the amplitudes are  
 910 already very small at 250  $\pm$  20  $\mu$ m (Fig 7). (In Fig 7 the data corresponding to these two versions

911 of the model are almost completely overlapping for more distal regions.) The amplitudes for  
912 the last action potential fit the data well, except in the most proximal regions (data not shown).  
913 For all versions of the Golding et al. 2001 model, AP amplitudes are too high at the most  
914 proximal distance range. As for the strongly propagating version of the Golding et al. 2001  
915 model (“fig8B” version), the amplitude of the first action potential is too high at the proximal  
916 locations, but further it fits the data well. The amplitude of the last action potential remains too  
917 high even at more distal locations. It is worth noting that, in the corresponding paper [26], they  
918 only examined a single action potential triggered by a 5 ms long input in their simulations, and  
919 did not examine or compare to their data the properties of the last action potential in a longer  
920 spike train. Finally, we note that in all versions of the Golding et al. 2001 model a spike train  
921 with frequency around 23 Hz was evoked and examined as it turned out to be difficult to set the  
922 frequency closer to 15 Hz.

923         The different versions of the Gómez González et al. 2011 model behave qualitatively  
924 similarly in this test, although there were smaller quantitative differences. In almost all versions  
925 the amplitudes of the first action potential in the dendrites are slightly too low at the most  
926 proximal locations but fit the experimental data better at further locations. The exceptions are  
927 the versions with the n128 and n129 morphologies, which have lower first action potential  
928 amplitudes at the furthest locations, but not low enough to be considered as weak propagating.  
929 The amplitudes for the last action potential are too high at the distal regions but fit better at the  
930 proximal ones. The only exception is the one with morphology n129, where the last action  
931 potential attenuates more at further locations and fits the data better.

932         In the case of the Katz et al. 2009 model, a spike train with frequency around 40 Hz was  
933 examined, as the firing frequency increases so suddenly with increasing current intensity in this  
934 model that no frequency closer to 15 Hz could be adjusted. In this model the last action potential

935 propagates too strongly, while the dendritic amplitudes for the first action potential are close to  
936 the experimental values.

937 In the Migliore et al. 2011 model the amplitudes for the last action potential are too high,  
938 while the amplitude of the first back-propagating action potential is too low at locations in the  
939  $250 \pm 20 \mu\text{m}$  and  $350 \pm 20 \mu\text{m}$  distance ranges.

940 Finally, all the models that we examined were found to be strongly propagating by the  
941 test, with the exception of those versions of the Golding et al. 2001 model that were explicitly  
942 developed to be weakly propagating.

943

#### 944 **PSP Attenuation Test**

945

946 In this test the extent of the attenuation of the amplitude of an excitatory post-synaptic  
947 potential (EPSP) is examined as it propagates towards the soma from different input locations  
948 in the apical trunk. The Katz et al. 2009, the Bianchi et al. 2012, and all versions of the Golding  
949 et al. 2001 models perform quite well in this test. The various versions of the Golding et al.  
950 2001 model are almost identical in this respect, which is not surprising as they differ only in  
951 the distribution of the sodium and A-type potassium channels. This shows that, as we would  
952 expect, these properties do not have much effect on the propagation of relatively low-amplitude  
953 signals such as unitary PSPs. Interestingly, the different versions of the Gómez González et al.  
954 2011 model, with different morphologies, behave quite differently, which shows that this  
955 behavior can depend very much on the morphology of the dendritic tree.

956

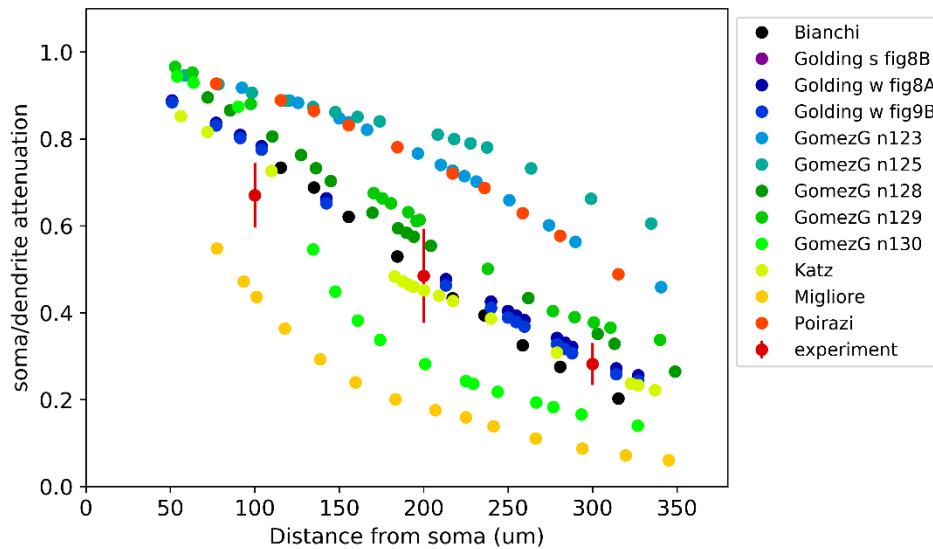

957

958 Fig 8: Results from the PSP Attenuation Test of HippoUnit applied to published models. Soma/dendrite EPSP  
959 attenuation as a function of the input distance from the soma in the different models.

960

## 961 Oblique Integration Test

962

963 This test probes the integration properties of the radial oblique dendrites of CA1 pyramidal  
964 cell models. The test is based on the experimental results described in [32]. In this study, the somatic  
965 voltage response was recorded while synaptic inputs in single oblique dendrites were activated in  
966 different spatio-temporal combinations using glutamate uncaging. The main finding was that a  
967 sufficiently high number of synchronously activated and spatially clustered inputs produced a  
968 supralinear response consisting of a fast (Na) and a slow (NMDA) component, while  
969 asynchronously activated inputs summed linearly or sublinearly.

970 This test selects all the radial oblique dendrites of the model that meet the experimental  
971 criteria: they are terminal dendrites (they have no child sections) and are at most 120  $\mu\text{m}$  from  
972 the soma. Then the selected dendrites are stimulated in a proximal and in a distal region  
973 (separately) using an increasing number of clustered, synchronous or asynchronous synaptic  
974 inputs to get the voltage responses of the model, and extract the features of dendritic integration.

975 The synaptic inputs are not unitary inputs, i.e., their strength is not equivalent to the strength of  
976 one synapse in the real cell; instead, the strength is adjusted in a way that 5 synchronous inputs  
977 are needed to trigger a dendritic action potential. The intensity of the laser used for glutamate  
978 uncaging was set in a similar way in the experiments [32]. Most of the features were extracted  
979 at this just-suprathreshold level of input. We noticed that in some cases the strength of the  
980 synapse is not set correctly by the test; for example, it may happen that an actual dendritic spike  
981 does not reach the spike detection threshold in amplitude, or sometimes the EPSP may reach  
982 the threshold for spike detection without actual spike generation. The user has the ability to set  
983 the threshold used by eFEL for spike detection, but sometimes a single threshold may not work  
984 even for the different oblique dendrites (and proximal and distal locations in the same dendrites)  
985 of a single model. For consistency, we used the same spike detection threshold of -20 mV for  
986 all the models.

987 The synaptic stimulus contains an AMPA and an NMDA receptor-mediated component.  
988 As the default synapse, HippoUnit uses the Exp2Syn double exponential synapse built into  
989 NEURON for the AMPA component, and its own built-in NMDA receptor model, whose  
990 parameters were set according to experimental data from the literature (see the Methods section  
991 for more details). In those models that originally do not have any synaptic component (the  
992 Bianchi et al 2011 model and all versions of the Golding et al. 2001 model) this default synapse  
993 was used. Both the Katz et al. 2009 and the Migliore et al. 2011 models used the Exp2Syn in  
994 their simulations, so in their case the time constants of this function were set to the values used  
995 in the original publications. As these models did not contain NMDA receptors, the default  
996 NMDA receptor model and the default AMPA/NMDA ratio of HippoUnit were used. The  
997 Gómez González et al 2011 and the Poirazi et al. 2003 models have their own AMPA and  
998 NMDA receptor models and they own AMPA/NMDA ratio values to be tested with.

999 As shown by the averaged “measured EPSP vs expected EPSP” curves in Fig 9, all three  
 1000 versions of the Golding et al. 2001 model have a jump in the amplitude of the somatic response  
 1001 at the threshold input level, which is the result of the generation of dendritic spikes. However,  
 1002 even these larger average responses do not reach the supralinear region, as it would be expected  
 1003 according to the experimental observations [32]. The reason for this discrepancy is that a  
 1004 dendritic spike was generated in the simulations in only a subset of the stimulated dendrites; in  
 1005 the rest of the dendrites tested, the amplitude of the EPSPs went above the spike detection  
 1006 threshold during the adjustment of the synaptic weight without actually triggering a dendritic  
 1007 spike, which led to the corresponding synaptic strength being incorrectly set for that particular  
 1008 dendrite. Averaging over the results for locations with and without dendritic spikes led to an  
 1009 overall sublinear integration profile.

1010

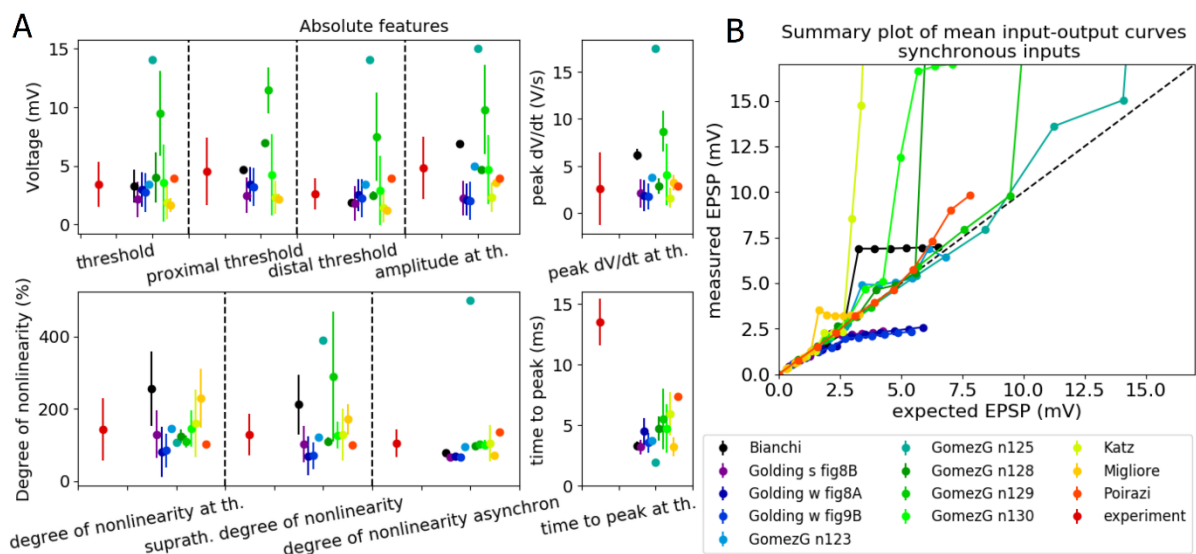

1011  
 1012 Fig 9: Results from the Oblique Integration Test of HippoUnit applied to published models. (A) Comparison of  
 1013 the responses of the models to experimental results (dark red) according to features of dendritic integration. (B)  
 1014 The averaged input – output curves of all the dendritic locations examined. EPSP amplitudes are measured at the  
 1015 soma.

1016

1017           The Migliore et al. 2011 model performs quite well on this test. In this case, seven  
1018 dendrites could be tested out of the ten dendrites within the correct distance range because, in  
1019 the others, the dendritic spike at the threshold input level also elicited a somatic action potential,  
1020 and therefore these dendrites were excluded from further testing.

1021           In the Katz et al. 2009 model all the selected dendritic locations could be tested, and in  
1022 most of them the synaptic strength could be adjusted appropriately. For a few dendrites, some  
1023 input levels higher than the threshold for dendritic spike generation also triggered somatic  
1024 action potentials. This effect causes the high supralinearity in the “measured EPSP vs expected  
1025 EPSP” curve in Fig 9, but has no effect on the extracted features.

1026           In the Bianchi et al. 2012 model only one dendrite could be selected, in which very high  
1027 amplitude dendritic spikes were evoked by the synaptic inputs, making the signal integration  
1028 highly supralinear.

1029           In the Poirazi et al. 2003 model also only one dendrite could be selected based on its  
1030 distance from the soma; furthermore, only the distal location could be tested even in this  
1031 dendrite, as at the proximal location the dendritic action potential at the threshold input level  
1032 generated a somatic action potential. However, at the distal location, the synaptic strength could  
1033 not be set correctly. For the synaptic strength chosen by the test, the actual threshold input level  
1034 where a dendritic spike is first generated is at 4 inputs, but this dendritic AP is too small in  
1035 amplitude to be detected, and the response to 5 inputs is recognized as the first dendritic spike  
1036 instead. Therefore, the features that should be extracted at the threshold input level are instead  
1037 extracted from the voltage response to 5 inputs. In this model this results in a reduced  
1038 *supralinearity* value, as this feature is calculated one input level higher than the actual threshold.  
1039 In addition, for even higher input levels dendritic bursts can be observed, which causes large  
1040 *supralinearity* values in the “measured EPSP vs expected EPSP” curve in Fig 9, but this does  
1041 not affect the feature values.

1042           Models from Gómez González et al. 2011 were expected to be particularly relevant for  
1043 this test, as these models were tuned to fit the same data set on which this test is based. However,  
1044 we encountered an important issue when comparing our test results for these models to the  
1045 results shown in the paper [53]. In particular, the paper clearly indicates which dendrites were  
1046 examined, and it is stated that those are at maximum 150  $\mu\text{m}$  from the soma. However, when  
1047 we measured the distance of these locations from the soma by following the path along the  
1048 dendrites (as it is done by the test of HippoUnit), we often found it to be larger than 150  $\mu\text{m}$ .  
1049 We note that when the distance was measured in 3D coordinates rather than along the dendrites,  
1050 all the dendrites used by Gómez González et al. 2011 appeared to be within 150  $\mu\text{m}$  of the  
1051 soma, so we assume that this definition was used in the paper. As we consider the path distance  
1052 to be more meaningful than Euclidean distance in this context, and this was also the criterion  
1053 used in the experimental study, we consistently use path distance in HippoUnit to find the  
1054 relevant dendritic segments. Nevertheless, this difference in the selection of dendrites should  
1055 be kept in mind when the results of this validation for models of Gómez González et al. 2011  
1056 are evaluated.

1057           In two versions of the Gómez González et al. 2011 model (those that were adjusted to  
1058 the n123 and n125 morphologies) only one oblique dendrite matched the experimental criteria  
1059 and could therefore be selected, and these are not among those that were studied by the  
1060 developers of the model. In each of these cases the dendritic spike at the proximal location at  
1061 the input threshold level triggered a somatic action potential, and therefore only the distal  
1062 location could be tested. In the case of the n125 morphology, the dendritic spikes that appear  
1063 first for just-suprathreshold input are so small in amplitude that they do not reach the spike  
1064 detection threshold (-20 mV), and are thus not detected. Therefore, the automatically adjusted  
1065 synaptic weight is larger than the appropriate value would be, which results in larger somatic  
1066 EPSPs than expected (see Fig 9). With this synaptic weight the first dendritic spike, and



1067 therefore the jump in the “measured EPSP vs expected EPSP” curve to the supralinear region  
1068 is for 4 synaptic inputs, instead of 5. This is also the case in one of the two selected dendrites  
1069 of the version of this model with the n128 morphology. Similarly to the Poirazi et al. 2003  
1070 model, this results in a lower *degree of nonlinearity at threshold* feature value, than it would be  
1071 if the feature were extracted at the actual threshold input level (4 inputs) instead of the one  
1072 which the test attempted to adjust (5 inputs). The *suprathreshold nonlinearity* feature has a high  
1073 value because at that input level (6 inputs), somatic action potentials are triggered.

1074 In the version of the Gómez González et al. 2011 model that uses the n129 morphology,  
1075 10 oblique dendrites could be selected for testing (none of them is among those that its  
1076 developers used) but only 4 could be tested because, for the rest, the dendritic spike at the  
1077 threshold input level already elicits a somatic action potential. The synaptic weights required to  
1078 set the threshold input level to 5 are not found correctly in most cases; the actual threshold input  
1079 level is at 4 or 3. Suprathreshold nonlinearity is high, because at that input level (6 inputs)  
1080 somatic action potentials are triggered for some of the examined dendritic locations.

1081 The version of the Gómez González et al. 2011 model that uses the n130 morphology  
1082 achieves the best (lowest) final score on this test. In this model many oblique dendrites could  
1083 be selected and tested, including two (179, 189) that the developers used in their simulations  
1084 [53]. In most cases the synaptic weights are nicely found to set the threshold input level to 5  
1085 synapses. For some dendrites there are somatic action potentials at higher input levels, but that  
1086 does not affect the features.

1087 The value of the *time to peak* feature for each model is much smaller than the  
1088 experimental value (Fig 9). This is because in each of the models the maximum amplitude of  
1089 the somatic EPSP is determined by the fast component, caused by the appearance of the  
1090 dendritic sodium spikes, while in the experimental observation this is rather shaped by the slow  
1091 NMDA component following the sodium spike.

## 1092 Overall performance and model comparison

1093

1094 In summary, using HippoUnit, we compared the behavior of several hippocampal CA1  
1095 pyramidal cell models available on ModelDB in several distinct domains, and found that all of  
1096 these models match experimental results well in some domains (typically those that they were  
1097 originally built to capture) but fit the experimental observation less precisely in others. Fig 10  
1098 summarizes the final scores achieved by the different models on the various tests (lower scores  
1099 indicate a better match in all cases).

1100

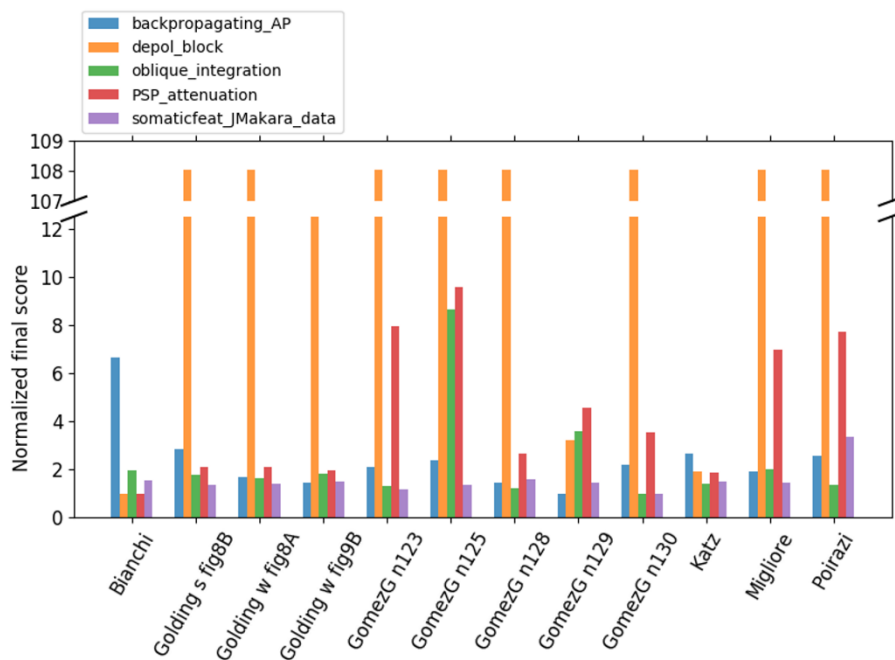

1101

1102 Fig 10: Normalized final scores achieved by the different published models on the various tests of HippoUnit. The  
1103 final scores of each test are normalized by dividing the scores of each model by the best achieved score on the  
1104 given test.

1105

1106 Perhaps a bit surprisingly, the different versions of the Golding et al. 2001 model  
1107 perform quite well on all of the tests (except for the Depolarization Block Test), even though  
1108 these are the simplest ones among the models in the sense that they contain the smallest number

1109 of different types of ion channels. On the other hand, they do not perform outstandingly well  
1110 on the Back-propagating Action Potential Test, although they were developed to capture the  
1111 behavior evaluated by this test.

1112 The Bianchi et al. 2012 model is the only one that can produce real depolarization block  
1113 within the range of input strengths examined by the corresponding test. The success of this  
1114 model in this test is not surprising because this is the only model that was tuned to reproduce  
1115 this behavior; on the other hand, the failure of the other models in this respect clearly shows  
1116 that proper depolarization block requires some combination of mechanisms that are at least  
1117 partially distinct from those that allow good performance in the other tests. The Bianchi et al.  
1118 2012 model achieves a relatively high final error score only on the Back-propagating Action  
1119 Potential Test, as action potentials seem to propagate too actively in its dendrites, leading to  
1120 high AP amplitudes even in more distal compartments.

1121 The Gómez González et al. 2011 models were developed to capture the same  
1122 experimental observations on dendritic integration that are tested by the Oblique Integration  
1123 Test of HippoUnit, but, somewhat surprisingly, some of its versions achieved quite high error  
1124 scores on this test, while others perform quite well. This is partly caused by the fact that  
1125 HippoUnit often selects different dendritic sections for testing from those that were studied by  
1126 the developers of these models (see above for details). Some of its versions also perform  
1127 relatively poorly on the PSP-Attenuation Test, similar to the Migliore et al. 2011 and the Poirazi  
1128 et al. 2003 models. The Katz et al. 2009 model is not outstandingly good in any of the tests, but  
1129 still achieves relatively good error scores everywhere (although its apparent good performance  
1130 on the Depolarization Block Test is misleading - see detailed explanation above).

1131 The model files that were used to test the models described above, the detailed validation  
1132 results (all the output files of HippoUnit), and the Jupyter Notebooks that show how to run the

1133 tests of HippoUnit on these models are available in the following Github repository:  
1134 [https://github.com/KaliLab/HippoUnit\\_demo](https://github.com/KaliLab/HippoUnit_demo).

1135

## 1136 **Application of HippoUnit to models built using automated parameter** 1137 **optimization within the Human Brain Project**

1138

1139 Besides enabling a detailed comparison of published models, HippoUnit can also be  
1140 used to monitor the performance of new models at various stages of model development. Here,  
1141 we illustrate this by showing how we have used HippoUnit within the HBP to systematically  
1142 validate detailed multi-compartmental models of hippocampal neurons developed using multi-  
1143 objective parameter optimization methods implemented by the open source Blue Brain Python  
1144 Optimization Library (BluePyOpt [15]). To this end, we extended HippoUnit to allow it to  
1145 handle the output of optimization performed by BluePyOpt (see Methods).

1146 Models of CA1 pyramidal cells were optimized using target feature data extracted from  
1147 the same sharp electrode dataset [3] that was also one of the datasets used by the Somatic  
1148 Features Test of HippoUnit. However, while during validation all the eFEL features that could  
1149 be successfully extracted from the data are considered, only a subset of these features was used  
1150 in the optimization (mostly those that describe the rate and timing of the spikes; e.g., the  
1151 different inter-spike interval (ISI), time to last/first spike, mean frequency features).

1152 In addition, sharp electrode measurements were also available for several types of  
1153 interneuron in the hippocampal CA1 region, and models of these interneurons were also  
1154 constructed using similar automated methods [3]. Using the appropriate observation file and  
1155 the stimulus file belonging to it, the Somatic Features Test of HippoUnit can also be applied to

1156 these models to evaluate their somatic spiking features. The other tests of HippoUnit are  
1157 currently not applicable to interneurons, mostly due to the lack of appropriate target data.

1158 We applied the tests of HippoUnit to the version of the models published in [3], and to  
1159 a later version (v4) described in Ecker et al. (2020)[55], which was intended to further improve  
1160 the dendritic behavior of the models, as this is critical for their proper functioning in the  
1161 network. The two sets of models were created using the same morphology files and similar  
1162 optimization methods and protocols. These new optimizations differed mainly in the allowed  
1163 range for the density of the sodium channels in the dendrites. For the pyramidal cell models a  
1164 new feature was also introduced in the parameter optimization that constrains the amplitudes  
1165 of back-propagating action potentials in the main apical dendrite. The new interneuron models  
1166 also had an exponentially decreasing (rather than constant) density of Na channels, and A-type  
1167 K channels with more hyperpolarized activation in their dendrites. For more details on the  
1168 models, see the original publications ([3,55]).

1169 After running all the tests of HippoUnit on both sets of models generated by BluePyOpt,  
1170 we performed a comparison of the old [3] and the new versions of the models by doing a  
1171 statistical analysis of the final scores achieved by the models of the same cell type on the  
1172 different tests. In Fig 11 the median, the interquartile range and the full range of the final error  
1173 scores achieved by the two versions of the model set are compared. According to the results of  
1174 the Wilcoxon signed-rank test the new version of the models achieved significantly better  
1175 scores on the Back-propagating Action Potential test ( $p = 0.0046$ ), on the Oblique Integration  
1176 Test ( $p = 0.0033$ ), and on the PSP Attenuation Test ( $p = 0.0107$ ), which is the result of reduced  
1177 dendritic excitability. Moreover, in most of the other cases the behavior of the models improved  
1178 slightly (but not significantly) with the new version. Only in the case of the Somatic Features  
1179 test applied to bAC interneurons did the new models perform slightly worse (but still quite  
1180 well), and this difference was not significant ( $p = 0.75$ ).

1181           These results show the importance of model validation performed against experimental  
1182 findings, especially those not considered when building the model, in every iteration during the  
1183 process of model development. This approach can greatly facilitate the construction of models  
1184 that perform well in a variety of contexts, help avoid model regression, and guide the model  
1185 building process towards a more robust and general implementation.  
1186

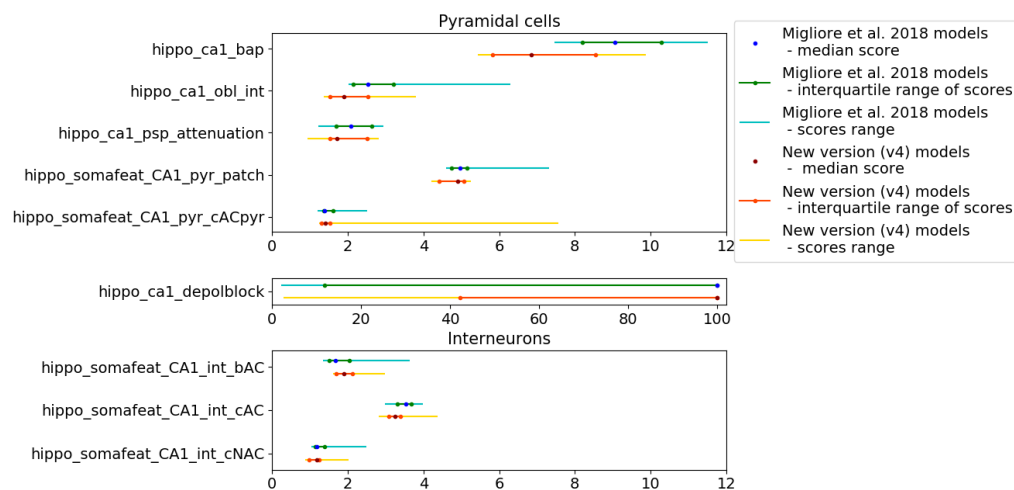

1187  
1188 Fig 11: Statistical comparison of the final scores achieved on the different tests by the two versions of hippocampal  
1189 CA1 models of the same cell types, developed by automated optimization using BluePyOpt.

1190

## 1191 **Integration of HippoUnit into the Validation Framework and the Brain** 1192 **Simulation Platform of the Human Brain Project**

1193

1194           The HBP is developing scientific infrastructure to facilitate advances in neuroscience,  
1195 medicine, and computing [56]. One component of this research infrastructure is the Brain  
1196 Simulation Platform (BSP) (<https://bsp.humanbrainproject.eu>), an online collaborative  
1197 platform that supports the construction and simulation of neural models at various scales. As  
1198 we argued above, systematic, automated validation of models is a critical prerequisite of  
1199 collaborative model development. Accordingly, the BSP includes a software framework for

1200 quantitative model validation and testing that explicitly supports applying a given validation  
1201 test to different models and storing the results [57]. The framework consists of a web service,  
1202 and a set of test suites, which are Python modules based on the SciUnit package. As we  
1203 discussed earlier, SciUnit uses the concept of capabilities, which are standardized interfaces  
1204 between the models to be tested and the validation tests. By defining the capabilities to which  
1205 models must adhere, individual validation tests can be implemented independently of any  
1206 specific model and used to validate any compatible model despite differences in their internal  
1207 structures, the language and/or the simulator used. Each test must include a specification of the  
1208 required model capabilities, the location of the reference (experimental) dataset, and data  
1209 analysis code to transform the recorded variables (e.g., membrane potential) into feature values  
1210 that allow the simulation results to be directly and quantitatively compared to the experimental  
1211 data through statistical analysis. The web services framework [57] supports the management of  
1212 models, tests, and validation results. It is accessible via web apps within the HBP Collaboratory,  
1213 and also through a Python client. The framework makes it possible to permanently record,  
1214 examine and reproduce validation results, and enables tracking the evolution of models over  
1215 time, as well as comparison against other models in the domain.

1216       Every test of HippoUnit described in this paper has been individually registered in the  
1217 Validation Framework. The JSON files containing the target experimental data for each test are  
1218 stored (besides the HippoUnit\_demo GitHub repository) in storage containers at the Swiss  
1219 National Supercomputing Centre (CSCS), where they are publicly available. The location of  
1220 the corresponding data file is associated with each registered test, so that the data are loaded  
1221 automatically when the test is run on a model via the Validation Framework. As the Somatic  
1222 Features Test of HippoUnit was used to compare models against five different data sets (data  
1223 from sharp electrode measurements in pyramidal cells and interneurons belonging to three  
1224 different electronic types, and data obtained from patch clamp recordings in pyramidal cells),

1225 these are considered to be and have been registered as five separate tests in the Validation  
1226 Framework.

1227 All the models that were tested and compared in this study (including the CA1 pyramidal  
1228 cell models from the literature and the BluePyOpt optimized CA1 pyramidal cells and  
1229 interneurons of the HBP) have been registered and are available in the Model Catalog of the  
1230 Validation Framework with their locations in the CSCS storage linked to them. In addition to  
1231 the modifications that were needed to make the models compatible with testing with HippoUnit  
1232 (described in the section “Methods – Models from literature”), the versions of the models  
1233 uploaded to the CSCS container also contain an `__init__.py` file. This file implements a  
1234 python class that inherits all the functions of the `ModelLoader` class of HippoUnit without  
1235 modification. Its role is to make the validation of these models via the Framework more  
1236 straightforward by defining and setting the parameters of the `ModelLoader` class (such as the  
1237 path to the HOC and NMODL files, the name of the section lists, etc.) that otherwise need to  
1238 be set after instantiating the `ModelLoader` (see the HippoUnit\_demo GitHub repository:  
1239 [https://github.com/KaliLab/HippoUnit\\_demo/tree/master/jupyter\\_notebooks](https://github.com/KaliLab/HippoUnit_demo/tree/master/jupyter_notebooks) ).

1240 The validation results discussed in this paper have also been registered in the Validation  
1241 Framework, with all their related files (output figures and JSON files) linked to them. These  
1242 can be accessed using the Model Validation app of the framework.

1243 The Brain Simulation Platform of the HBP contains several online ‘Use Cases’, which  
1244 are available on the platform and help the users to try and use the various established pipelines.  
1245 The Use Case called ‘Hippocampus Single Cell Model Validation’ can be used to apply the  
1246 tests of HippoUnit to models that were built using automated parameter optimization within the  
1247 HBP.

1248 The Brain Simulation Platform also hosts interactive “Live Paper” documents that refer  
1249 to published papers related to the models or software tools on the Platform. Live Papers provide



1250 links that make it possible to visualize or download results and data discussed in the respective  
1251 paper, and even to run the associated simulations on the Platform. We have created a Live Paper  
1252 ([https://humanbrainproject.github.io/hbp-bsp-live-](https://humanbrainproject.github.io/hbp-bsp-live-papers/2020/saray_et_al_2020/saray_et_al_2020.html)  
1253 [papers/2020/saray\\_et\\_al\\_2020/saray\\_et\\_al\\_2020.html](https://humanbrainproject.github.io/hbp-bsp-live-papers/2020/saray_et_al_2020/saray_et_al_2020.html)) showing the results of the study  
1254 presented in this paper in more detail. This interactive document provides links to all the output  
1255 figures and data files resulting from the validation of the models from literature discussed here.  
1256 This provides a more detailed insight into their behavior individually. Moreover, as part of this  
1257 Live Paper a HippoUnit Use Case is also available in the form of a Jupyter Notebook, which  
1258 guides the user through running the validation tests of HippoUnit on the models from literature  
1259 that are already registered in the Framework, and makes it possible to reproduce the results  
1260 presented here.

## 1261 **Discussion**

### 1262 **Role of validation in collaborative model building**

1263

1264 For anatomically and biophysically detailed data-driven neural models to be predictive,  
1265 it is important that they are able to generalize beyond their original scope. However, most  
1266 detailed biophysical models to date were built to capture only a few important or interesting  
1267 properties of a given neuron type. Systematic testing and comparison of the behavior of these  
1268 models is still rare, and thus it is often unknown how these models would behave when used  
1269 under different circumstances, and to what extent they can be used to address different scientific  
1270 questions. As a result, the modeling community still keeps building new models of the same  
1271 cell type for various purposes, instead of reusing and further developing the already existing  
1272 ones. On the other hand, in those cases when new models are based on previously published

1273 ones, model parameters are often adjusted to fit a new set of experimental data. These  
1274 adjustments typically alter the ability of the model to capture the experimental data targeted by  
1275 the original model, but this remains unrecognized because of the lack of comprehensive testing.  
1276 As we have shown, an illustrative example of this regression issue is the Bianchi et al. 2012  
1277 model. This model was mainly based on the Poirazi et al. 2013 model, which was developed to  
1278 show specific dendritic behaviors and was even tested using data on back-propagating action  
1279 potentials during its development [51]. However, the test results presented above indicate that  
1280 when the somatic behavior of this model was adjusted to reproduce experimental observations  
1281 on depolarization block, it lost the ability to show realistic back-propagation of action potentials  
1282 into the apical dendrite. In addition, some publications on neuronal models simply state that the  
1283 model has been validated against electrophysiological data, but the details of these validations  
1284 (such as the methods used, the experimental data considered or even the results) are usually not  
1285 shared. Finally, more systematic testing and coordinated development would enable building  
1286 consensus (community) models, which would aim to capture a wide range of experimental  
1287 observations.

1288         The framework for implementing unit tests that make it possible to automatically and  
1289 systematically compare the behavior of models to experimental data already exists (SciUnit  
1290 [18]). Furthermore, the recently developed Validation Framework of the HBP makes it possible  
1291 to collect neural models and validation tests, and supports the application of the registered tests  
1292 to the registered models. Most importantly, it makes it possible to save the validation results  
1293 and link them to the models in the Model Catalog, making them publicly available and traceable  
1294 for the modeling community.

1295         Our goal was to contribute to this new approach in collaborative model building by  
1296 developing a validation suite to test the behavior of models of the hippocampal CA1 pyramidal  
1297 neuron, which is one of the most studied cell types in the brain. Here we presented how we

1298 applied HippoUnit to test and compare the behavior of several models of this cell type available  
1299 on ModelDB [17] in several distinct domains against electrophysiological data available in the  
1300 literature. Through the example of the models optimized within the HBP we also showed how  
1301 a test suite like HippoUnit can be a useful tool in tracing the performance of models during the  
1302 process of their development.

1303         Although we consider it essential to evaluate the generalization properties of neural  
1304 models and test them in as many domains as possible, it is important to emphasize that a high  
1305 error score on a given validation test using a particular experimental dataset does not mean that  
1306 the model is not good enough or cannot be useful for a variety of purposes (including the ones  
1307 it was originally developed for). The discrepancy between the target data and the model's  
1308 behavior, as quantified by the validation tests, may be due to several different reasons. First, all  
1309 experimental data contain noise and may have systematic biases associated with the  
1310 experimental methods employed. Sometimes the experimental protocol is not described in  
1311 sufficient detail to allow its faithful reproduction in the simulations. It may also occur that a  
1312 model is based on experimental data that were obtained under conditions that are substantially  
1313 different from the conditions for the measurement of the validation target dataset. Using  
1314 different recording techniques, such as sharp electrode or patch clamp recordings or the  
1315 different circumstances of the experiments (e.g., the strain, age, and sex of the animal, or the  
1316 temperature during measurement) can heavily affect the experimental results. Furthermore, the  
1317 post-processing of the recorded electrophysiological data can also alter the results. For these  
1318 reasons, probably no single model should be expected to achieve an arbitrarily low score on all  
1319 of the validation tests developed for a particular cell type. Keeping this in mind, it is important  
1320 that the modelers decide which properties of the cell type are relevant for them, and what  
1321 experimental conditions they aim to mimic. Validation results should be interpreted or taken  
1322 into account accordingly, and the tests themselves may need to be adapted.

1323 By providing the software tools and examples on how to validate the different models,  
1324 we hope to encourage the modeling community to use more systematic testing during model  
1325 development, in order to create neural models that generalize better, and to make the process  
1326 of model building more reproducible and transparent.

1327

## 1328 **Uniform model formats reduce the costs of validation**

1329

1330 Although HippoUnit is built in a way that its tests are, in principle, model-agnostic, so  
1331 that the implementation of the tests does not depend on model implementation, it still required  
1332 a considerable effort to create the standalone versions of the models from literature to be tested,  
1333 even though all of the selected models were developed for the NEURON simulator. This is  
1334 because each model has a different file structure and internal logic that needs to be understood  
1335 in order to create an equivalent standalone version. When the section lists of the main dendritic  
1336 types do not exist, the user needs to create them by extensively analyzing the morphology and  
1337 even doing some coding. In order to reduce the costs of systematic validation, models would  
1338 need to be expressed in a format that is uniform and easy to test. As HippoUnit already has its  
1339 capability functions implemented in a way that it is able to handle models developed in  
1340 NEURON, the only requirement for such models is that they should contain a HOC file that  
1341 describes the morphology (including the section lists for the main dendritic types of the  
1342 dendritic tree) and all the biophysical parameters of the model, without any additional  
1343 simulations, GUIs or run-time modifications. Currently, such a standalone version of the  
1344 models is not made available routinely in publications or on-line databases, but could be added  
1345 by the creators of the models with relatively little effort.

1346           On the other hand, applying the tests of HippoUnit to models built in other languages  
1347 requires the re-implementation of the capability functions that are responsible for running the  
1348 simulations on the model (see Methods). In order to save the user from this effort, it would be  
1349 useful to publish neuronal models in a standard and uniform format that is simulator  
1350 independent and allows general use in a variety of paradigms. This would allow an easier and  
1351 more transparent process of community model development and validation, as it avoids the  
1352 need of reimplementation of parts of software tools (such as validation suites), and the creation  
1353 of new, (potentially) non-traced software versions. This approach is already initiated for  
1354 neurons and neuronal networks by the developers of NeuroML [58], NineML [59], PyNN [60],  
1355 Sonata [61], and Brian [62]. Once a large set of models becomes available in these standardized  
1356 formats, it will be straightforward to extend HippoUnit (and other similar test suites) to handle  
1357 these models.

1358

## 1359 **Extensibility of HippoUnit**

1360

1361           As HippoUnit is based on the SciUnit package [18] it inherits SciUnits's modular  
1362 structure. This means that a test is usually composed of four main classes: the test class, the  
1363 model class, the capabilities class and the score class (as described in more detail in the Methods  
1364 section). Thanks to this structure it is easy to extend HippoUnit with new tests by implementing  
1365 them in new test classes and adding the capabilities and scores needed. The methods of the new  
1366 capabilities can be implemented in the `ModelLoader` class, which is a generalized `Model` class  
1367 for models built in the NEURON simulator, or in a newly created `Model` class specific to the  
1368 model to be tested.

1369           As HippoUnit is open-source and is shared on GitHub, it is possible for other developers,  
1370 modelers or scientists to modify or extend the test suite working on their own forks of the  
1371 repository. If they would like to directly contribute to HippoUnit, a ‘pull request’ can be created  
1372 to the main repository.

1373

## 1374 **Generalization possibilities of the tests of HippoUnit**

1375

1376           In the current version of HippoUnit most of the validation tests can only be used to test  
1377 models of hippocampal CA1 pyramidal cells, as the observation data come from  
1378 electrophysiological measurements of this cell type and the tests were designed to follow the  
1379 experimental protocols of the papers from which these data derive. However, with small  
1380 modifications most of the tests can be used for other cell types, or with slightly different  
1381 stimulation protocols, if there are experimental data available for the features or properties  
1382 tested.

1383           The Somatic Features Test can be used for any cell type and with any current step  
1384 injection protocol even in its current form using the appropriate data and configuration files.  
1385 These two files must be in agreement with each other; in particular, the configuration file should  
1386 contain the parameters of the step current protocols (delay, duration, amplitude) used in the  
1387 experiments from which the feature values in the data file derive. In this study this test was used  
1388 with two different experimental protocols (sharp electrode measurements and patch clamp  
1389 recordings that used different current step amplitudes and durations), and for testing four  
1390 different cell types (hippocampal CA1 PC and interneurons).

1391           In the current version of the Depolarization Block Test the properties of the stimulus  
1392 (delay, duration, amplitudes) are hard-coded to reproduce the experimental protocol used in a

1393 study of CA1 PCs [24]. However, the test could be easily modified to read these parameters  
1394 from a configuration file like in the case of other tests, and then the test could be applied to  
1395 other cell types if data from similar experimental measurements are available.

1396 As the Back-propagating AP Test examines the back-propagation efficacy of action  
1397 potentials in the main apical dendrite (trunk), it is mainly suitable for testing pyramidal cell  
1398 models; however, it can be used for PC models from other hippocampal or cortical regions,  
1399 potentially using different distance ranges of the recording sites. If different distances are used,  
1400 the feature names ('AP1\_amp\_X' and 'APlast\_amp\_X', where X is the recording distance) in  
1401 the observation data file and the recording distances given in the stimuli file must be in  
1402 agreement. Furthermore, it would also be possible to set a section list of other dendritic types  
1403 instead of the trunk to be examined by the test. This way, models of other cell types (with  
1404 dendritic trees qualitatively different from those of PCs) could also be tested. The frequency  
1405 range of the spike train (10 – 20 Hz, preferring values closest to 15 Hz) is currently hard-coded  
1406 in the function that automatically finds the appropriate current amplitude, but the  
1407 implementation could be made more flexible in this case as well.

1408 The PSP Attenuation Test is quite general. Both the distances and tolerance values that  
1409 determine the stimulation locations on the dendrites and the properties of the synaptic stimuli  
1410 are given using the configuration file. Here again the feature names in the observation data file  
1411 ('attenuation\_soma/dend\_x\_um', where x is the distance from the soma) must fit the distances  
1412 of the stimulation locations in the configuration file when one uses the tests with data from a  
1413 different cell type or experimental protocol. Similarly to the Back-propagating AP Test the PSP  
1414 Attenuation Test also examines the main apical dendrite (trunk), but could be altered to use  
1415 section lists of other dendritic types.

1416 The Oblique Integration Test is very specific to the experimental protocol of [32]. There  
1417 is no configuration file used here, but the synaptic parameters (of the `ModelLoader` class) and

1418 the number of synapses to which the model should first generate a dendritic spike  
1419 ('threshold\_index' parameter of the test class) can be adjusted by the user after instantiating the  
1420 `ModelLoader` and the test classes respectively. The time intervals between the inputs  
1421 (synchronous (0.1 ms), asynchronous (2.0 ms)) are currently hard-coded in the test.

1422 HippoUnit has been used mainly to test models of rat hippocampal CA1 pyramidal cells  
1423 as described above. However, having the appropriate observation data, most of its tests could  
1424 easily be adapted to test models of different cell types, even in cases when the experimental  
1425 protocol is slightly different from the currently implemented ones. The extent to which a test  
1426 needs to be modified in order to test models of other cell types depends on how much the  
1427 behavior of the new cell type differs from the behavior of CA1 pyramidal cells, and to what  
1428 extent the protocol of the experiment differs from the ones we used as the bases of comparison  
1429 in the current study.

1430

## 1431 **Acknowledgements**

1432 We thank Judit Makara and her group in the Laboratory of Neuronal Signaling, Institute  
1433 of Experimental Medicine, Hungary for the patch clamp recording data used in this study. We  
1434 also thank Luca Tar, a member of our group, for her help in testing the validation tests, and in  
1435 literature review, and for useful discussions.

1436

## 1437 **References**

- 1438 1. Einevoll GT, Destexhe A, Diesmann M, Grün S, Jirsa V, de Kamps M, et al. The  
1439 Scientific Case for Brain Simulations. *Neuron*. 2019;102: 735–744.  
1440 doi:10.1016/j.neuron.2019.03.027



- 1441 2. Káli S, Freund TF. Distinct properties of two major excitatory inputs to hippocampal  
1442 pyramidal cells: A computational study. *European Journal of Neuroscience*. 2005;22:  
1443 2027–2048. doi:10.1111/j.1460-9568.2005.04406.x
- 1444 3. Migliore R, Lupascu CA, Bologna LL, Romani A, Courcol JD, Antonel S, et al. The  
1445 physiological variability of channel density in hippocampal CA1 pyramidal cells and  
1446 interneurons explored using a unified data-driven modeling workflow. *PLoS*  
1447 *Computational Biology*. 2018;14: 1–25. doi:10.1371/journal.pcbi.1006423
- 1448 4. Hay E, Hill S, Schürmann F, Markram H, Segev I. Models of neocortical layer 5b  
1449 pyramidal cells capturing a wide range of dendritic and perisomatic active properties.  
1450 *PLoS Computational Biology*. 2011;7. doi:10.1371/journal.pcbi.1002107
- 1451 5. Herz AVM, Gollisch T, Machens CK, Jaeger D. Modeling single-neuron dynamics and  
1452 computations: A balance of detail and abstraction. *Science*. 2006;314: 80–85.  
1453 doi:10.1126/science.1127240
- 1454 6. Poirazi P, Brannon T, Mel BW. Pyramidal neuron as two-layer neural network. *Neuron*.  
1455 2003;37: 989–999. doi:10.1016/S0896-6273(03)00149-1
- 1456 7. Bower JM. The 40-year history of modeling active dendrites in cerebellar purkinje cells:  
1457 Emergence of the first single cell “community model.” *Frontiers in Computational*  
1458 *Neuroscience*. 2015;9: 1–18. doi:10.3389/fncom.2015.00129
- 1459 8. Traub RD, Wong RKS, Miles R, Michelson H. A model of a CA3 hippocampal  
1460 pyramidal neuron incorporating voltage-clamp data on intrinsic conductances. *Journal*  
1461 *of Neurophysiology*. 1991;66: 635–650. doi:10.1152/jn.1991.66.2.635
- 1462 9. Almog M, Korngreen A. A quantitative description of dendritic conductances and its  
1463 application to dendritic excitation in layer 5 pyramidal neurons. *Journal of Neuroscience*.  
1464 2014;34: 182–196. doi:10.1523/JNEUROSCI.2896-13.2014

- 1465 10. Markram H, Muller E, Ramaswamy S, Reimann MW, Abdellah M, Sanchez CA, et al.  
1466 Reconstruction and Simulation of Neocortical Microcircuitry. *Cell*. 2015;163: 456–492.  
1467 doi:10.1016/j.cell.2015.09.029
- 1468 11. Traub RD, Contreras D, Cunningham MO, Murray H, LeBeau FEN, Roopun A, et al.  
1469 Single-column thalamocortical network model exhibiting gamma oscillations, sleep  
1470 spindles, and epileptogenic bursts. *Journal of Neurophysiology*. 2005;93: 2194–2232.  
1471 doi:10.1152/jn.00983.2004
- 1472 12. Schneider CJ, Bezaire M, Soltesz I. Toward a full-scale computational model of the rat  
1473 dentate gyrus. *Frontiers in Neural Circuits*. 2012;6: 1–8. doi:10.3389/fncir.2012.00083
- 1474 13. Bezaire MJ, Raikov I, Burk K, Vyas D, Soltesz I. Interneuronal mechanisms of  
1475 hippocampal theta oscillations in a full-scale model of the rodent CA1 circuit. *eLife*.  
1476 2016;5: 1–106. doi:10.7554/eLife.18566
- 1477 14. Friedrich P, Vella M, Gulyás AI, Freund TF, Káli S. A flexible, interactive software  
1478 tool for fitting the parameters of neuronal models. *Frontiers in Neuroinformatics*. 2014;8:  
1479 1–19. doi:10.3389/fninf.2014.00063
- 1480 15. van Geit W, Gevaert M, Chindemi G, Rössert C, Courcol JD, Muller EB, et al.  
1481 BluePyOpt: Leveraging open source software and cloud infrastructure to optimise model  
1482 parameters in neuroscience. *Frontiers in Neuroinformatics*. 2016;10: 1–18.  
1483 doi:10.3389/fninf.2016.00017
- 1484 16. Vanier MC, Bower JM. A comparative survey of automated parameter-search methods  
1485 for compartmental neural models. *Journal of Computational Neuroscience*. 1999;7: 149–  
1486 171. doi:10.1023/A:1008972005316
- 1487 17. McDougal RA, Morse TM, Carnevale T, Marenco L, Wang R, Migliore M, et al.  
1488 Twenty years of ModelDB and beyond: building essential modeling tools for the future

- 1489 of neuroscience. *Journal of Computational Neuroscience*. 2017;42: 1–10.  
1490 doi:10.1007/s10827-016-0623-7
- 1491 18. Omar C, Aldrich J, Gerkin RC. Collaborative infrastructure for test-driven scientific  
1492 model validation. 36th International Conference on Software Engineering, ICSE  
1493 Companion 2014 - Proceedings. 2014; 524–527. doi:10.1145/2591062.2591129
- 1494 19. Gerkin R, Omar C. NeuroUnit: Validation Tests for Neuroscience Models. *Frontiers in*  
1495 *Neuroinformatics*. 2013. doi:10.3389/conf.fninf.2013.09.00013
- 1496 20. Appukuttan S, Garcia PE, Davison AP. MorphoUnit. Zenodo; 2020.  
1497 doi:<https://doi.org/10.5281/zenodo.3862936>
- 1498 21. Appukuttan S, Dainauskas J, Davison AP. SynapseUnit. Zenodo; 2020.  
1499 doi:<http://doi.org/10.5281/zenodo.3862944>
- 1500 22. Garcia PE, Davison AP. HippoNetworkUnit. Zenodo; 2020.  
1501 doi:<http://doi.org/10.5281/zenodo.3886484>
- 1502 23. Sharma BL, Davison AP. CerebUnit. Zenodo; 2020.  
1503 doi:<http://doi.org/10.5281/zenodo.3885673>
- 1504 24. Bianchi D, Marasco A, Limongiello A, Marchetti C, Marie H, Tirozzi B, et al. On the  
1505 mechanisms underlying the depolarization block in the spiking dynamics of CA1  
1506 pyramidal neurons. *Journal of Computational Neuroscience*. 2012;33: 207–225.  
1507 doi:10.1007/s10827-012-0383-y
- 1508 25. Spruston N, Schiller Y, Stuart G, Sakmann B. Activity-Dependent Action Potential  
1509 Invasion and Calcium Influx into Hippocampal CA1 Dendrites. *Science*. 1995;268: 297–  
1510 300. doi:10.1126/science.7716524
- 1511 26. Golding NL, Kath WL, Spruston N. Dichotomy of action-potential backpropagation in  
1512 CA1 pyramidal neuron dendrites. *Journal of Neurophysiology*. 2001;86: 2998–3010.  
1513 doi:10.1152/jn.2001.86.6.2998

- 1514 27. Gasparini S, Losonczy A, Chen X, Johnston D, Magee JC. Associative pairing enhances  
1515 action potential back-propagation in radial oblique branches of CA1 pyramidal neurons.  
1516 *Journal of Physiology*. 2007;580: 787–800. doi:10.1113/jphysiol.2006.121343
- 1517 28. Magee JC, Cook EP. Somatic EPSP amplitude is independent of synapse location in  
1518 hippocampal pyramidal neurons. *Nature Neuroscience*. 2000;3: 895–903.  
1519 doi:10.1038/78800
- 1520 29. Gasparini S, Magee JC. State-dependent dendritic computation in hippocampal CA1  
1521 pyramidal neurons. *Journal of Neuroscience*. 2006;26: 2088–2100.  
1522 doi:10.1523/JNEUROSCI.4428-05.2006
- 1523 30. Ariav G, Polsky A, Schiller J. Submillisecond precision of the input-output  
1524 transformation function mediated by fast sodium dendritic spikes in basal dendrites of  
1525 CA1 pyramidal neurons. *Journal of Neuroscience*. 2003;23: 7750–7758.  
1526 doi:10.1523/jneurosci.23-21-07750.2003
- 1527 31. Takahashi H, Magee JC. Pathway Interactions and Synaptic Plasticity in the Dendritic  
1528 Tuft Regions of CA1 Pyramidal Neurons. *Neuron*. 2009;62: 102–111.  
1529 doi:10.1016/j.neuron.2009.03.007
- 1530 32. Losonczy A, Magee JC. Integrative Properties of Radial Oblique Dendrites in  
1531 Hippocampal CA1 Pyramidal Neurons. *Neuron*. 2006;50: 291–307.  
1532 doi:10.1016/j.neuron.2006.03.016
- 1533 33. Hines ML, Carnevale NT. The NEURON Simulation Environment. *Neural*  
1534 *Computation*. 1997;9: 1179–1209. doi:https://doi.org/10.1162/neco.1997.9.6.1179
- 1535 34. Druckmann S, Banitt Y, Gidon A, Schrümann F, Markram H, Segev I. A novel multiple  
1536 objective optimization framework for constraining conductance-based neuron models by  
1537 experimental data. *Frontiers in Neuroscience*. 2007;1: 7–18.  
1538 doi:10.3389/neuro.01.1.1.001.2007

- 1539 35. van Geit W, Moor R, Ranjan R, Roessert C, Riquelme L. Electrophys Feature  
1540 Extraction Library. 2020. [cited 25. March 2020] GitHub repository [Internet] Available:  
1541 <https://github.com/BlueBrain/eFEL>
- 1542 36. Tripathy SJ, Savitskaya J, Burton SD, Urban NN, Gerkin RC. NeuroElectro: A window  
1543 to the world's neuron electrophysiology data. *Frontiers in Neuroinformatics*. 2014;8: 1–  
1544 11. doi:10.3389/fninf.2014.00040
- 1545 37. Wheeler DW, White CM, Rees CL, Komendantov AO, Hamilton DJ, Ascoli GA.  
1546 Hippocampome.org: A knowledge base of neuron types in the rodent hippocampus.  
1547 *eLife*. 2015;4: 1–28. doi:10.7554/eLife.09960
- 1548 38. Staff NP, Jung HY, Thiagarajan T, Yao M, Spruston N. Resting and active properties  
1549 of pyramidal neurons in subiculum and CA1 of rat hippocampus. *Journal of*  
1550 *Neurophysiology*. 2000;84: 2398–2408. doi:10.1152/jn.2000.84.5.2398
- 1551 39. Dougherty KA, Islam T, Johnston D. Intrinsic excitability of CA1 pyramidal neurones  
1552 from the rat dorsal and ventral hippocampus. *Journal of Physiology*. 2012;590: 5707–  
1553 5722. doi:10.1113/jphysiol.2012.242693
- 1554 40. Malik R, Dougherty KA, Parikh K, Byrne C, Johnston D. Mapping the  
1555 electrophysiological and morphological properties of CA1 pyramidal neurons along the  
1556 longitudinal hippocampal axis. *Hippocampus*. 2016;26: 341–361.  
1557 doi:10.1002/hipo.22526
- 1558 41. McDermott CM, Hardy MN, Bazan NG, Magee JC. Sleep deprivation-induced  
1559 alterations in excitatory synaptic transmission in the CA1 region of the rat hippocampus.  
1560 *Journal of Physiology*. 2006;570: 553–565. doi:10.1113/jphysiol.2005.093781
- 1561 42. Graves AR, Moore SJ, Bloss EB, Mensh BD, Kath WL, Spruston N. Hippocampal  
1562 Pyramidal Neurons Comprise Two Distinct Cell Types that Are Countermodulated by  
1563 Metabotropic Receptors. *Neuron*. 2012;76: 776–789. doi:10.1016/j.neuron.2012.09.036

- 1564 43. Golding NL, Mickus TJ, Katz Y, Kath WL, Spruston N. Factors mediating powerful  
1565 voltage attenuation along CA1 pyramidal neuron dendrites. *Journal of Physiology*.  
1566 2005;568: 69–82. doi:10.1113/jphysiol.2005.086793
- 1567 44. Bormann I. DigitizeIt: Digitizer software - digitize a scanned graph or chart into (x,y)-  
1568 data. 2020. [cited 25. March 2020] [Internet] Available: <https://www.digitizeit.de/>
- 1569 45. Jahr CE, Stevens CF. Voltage dependence of NMDA-activated macroscopic  
1570 conductances predicted by single-channel kinetics. *Journal of Neuroscience*. 1990;10:  
1571 3178–3182. doi:10.1523/jneurosci.10-09-03178.1990
- 1572 46. Hestrin S, Nicoll RA, Perkel DJ, Sah P. Analysis of excitatory synaptic action in  
1573 pyramidal cells using whole-cell recording from rat hippocampal slices. *Physiology*.  
1574 1990; 203–225. doi:10.1113/jphysiol.1990.sp017980
- 1575 47. Korinek M, Sedlacek M, Cais O, Dittert I, Vyklicky L. Temperature dependence of N-  
1576 methyl-d-aspartate receptor channels and N-methyl-d-aspartate receptor excitatory  
1577 postsynaptic currents. *Neuroscience*. 2010;165: 736–748.  
1578 doi:10.1016/j.neuroscience.2009.10.058
- 1579 48. Gevaert M, Kanari L, Palacios J, Zisis E, Coste B. NeuroM. 2020. [cited 25. March  
1580 2020] GitHub repository [Internet] Available: <https://github.com/BlueBrain/NeuroM>
- 1581 49. Katz Y, Menon V, Nicholson DA, Geinisman Y, Kath WL, Spruston N. Synapse  
1582 Distribution Suggests a Two-Stage Model of Dendritic Integration in CA1 Pyramidal  
1583 Neurons. *Neuron*. 2009;63: 171–177. doi:10.1016/j.neuron.2009.06.023
- 1584 50. Migliore M, de Blasi I, Tegolo D, Migliore R. A modeling study suggesting how a  
1585 reduction in the context-dependent input on CA1 pyramidal neurons could generate  
1586 schizophrenic behavior. *Neural Networks*. 2011;24: 552–559.  
1587 doi:10.1016/j.neunet.2011.01.001

- 1588 51. Poirazi P, Brannon T, Mel BW. Arithmetic of subthreshold synaptic summation in a  
1589 model CA1 pyramidal cell. *Neuron*. 2003;37: 977–987. doi:10.1016/S0896-  
1590 6273(03)00148-X
- 1591 52. Shah MM, Migliore M, Valencia I, Cooper EC, Brown DA. Functional significance of  
1592 axonal Kv7 channels in hippocampal pyramidal neurons. *Proceedings of the National  
1593 Academy of Sciences of the United States of America*. 2008;105: 7869–7874.  
1594 doi:10.1073/pnas.0802805105
- 1595 53. Gómez González JF, Mel BW, Poirazi P. Distinguishing linear vs. non-linear  
1596 integration in CA1 radial oblique dendrites: It’s about time. *Frontiers in Computational  
1597 Neuroscience*. 2011;5: 1–12. doi:10.3389/fncom.2011.00044
- 1598 54. Jeffrey M. Perkel. Why Jupyter is data scientists’ computational notebook of choice.  
1599 *Nature*. 2018; 5–6. Available: <https://www.nature.com/articles/d41586-018-07196-1>
- 1600 55. Ecker A, Romani A, Sáray S, Káli S, Migliore M, Mercer A, et al. Data-driven  
1601 integration of hippocampal CA1 synapse physiology in silico. *Hippocampus*. 2020. doi:  
1602 Forthcoming
- 1603 56. Amunts K, Ebell C, Muller J, Telefont M, Knoll A, Lippert T. The Human Brain  
1604 Project: Creating a European Research Infrastructure to Decode the Human Brain.  
1605 *Neuron*. 2016;92: 574–581. doi:10.1016/j.neuron.2016.10.046
- 1606 57. Fragnaud H, Gonin J, Duperrier J, Legouee E, Davison AP, Appukuttan S. hbp-  
1607 validation-framework. Zenodo; 2020. doi:<http://doi.org/10.5281/zenodo.3888123>
- 1608 58. Gleeson P, Crook S, Cannon RC, Hines ML, Billings GO, Farinella M, et al. NeuroML:  
1609 A language for describing data driven models of neurons and networks with a high  
1610 degree of biological detail. *PLoS Computational Biology*. 2010;6: 1–19.  
1611 doi:10.1371/journal.pcbi.1000815

- 1612 59. Raikov I. NineML – a description language for spiking neuron network modeling: the  
1613 abstraction layer. BMC Neuroscience. 2010;11: 2202. doi:10.1186/1471-2202-11-s1-  
1614 p66
- 1615 60. Davison AP, Brüderle D, Eppler J, Kremkow J, Muller E, Pecevski D, et al. PyNN: A  
1616 common interface for neuronal network simulators. Frontiers in Neuroinformatics.  
1617 2009;2: 1–10. doi:10.3389/neuro.11.011.2008
- 1618 61. Dai K, Hernando J, Billeh YN, Gratiy SL, Planas J, Davison A, et al. The SONATA  
1619 Data Format for Efficient Description of Large-Scale Network Models. PLoS  
1620 Computational Biology. 2019;16: 1–24. doi:10.2139/ssrn.3387685
- 1621 62. Stimberg M, Brette R, Goodman DFM. Brian 2, an intuitive and efficient neural  
1622 simulator. eLife. 2019;8: 1–41. doi:10.7554/eLife.47314

1623

## 1624 **Supporting information**

1625

### 1626 **S1 Appendix. Example of running the SomaticFeaturesTest of HippoUnit** 1627 **using a Jupyter notebook**

1628

1629 As the first step HippoUnit’s test classes and `ModelLoader` class, along with a few  
1630 additional Python packages must be imported:

```
1631 1. from __future__ import print_function #needed only in Python 2  
1632 2. % matplotlib inline  
1633 3.  
1634 4. from hippounit.utils import ModelLoader  
1635 5. from hippounit import tests
```



```
1636 6.  
1637 7. import pkg_resources  
1638 8. import json  
1639 9. import collections  
1640 10. import numpy
```

1641 Then the path to external mechanisms used by the Neuron implementation of the model  
1642 (NMODL files) needs to be provided, which will be an argument to the `ModelLoader` class,  
1643 so that the NMODL files can be compiled when the `ModelLoader` class is instantiated (if they  
1644 are not compiled yet). Next, the variables related to the model are set. The initial voltage  
1645 (`v_init`) and temperature (`celsius`) values specific to the model need to be set; otherwise,  
1646 the default value in the corresponding capability method of the `ModelLoader` will be used.  
1647 Setting the `cvode_active` boolean parameter to `True` or `False`, the user can decide to run  
1648 the simulations using variable or fixed time step, respectively.

```
1649 11. # path to NMODL files  
1650 12. mod_files_path = "/home/saray/published_models/Ca1_Bianchi_2012/experiment/"  
1651 13.  
1652 14. #all the outputs will be saved here. It will be an argument to the test.  
1653 15. base_directory = '/mnt/csoport31-  
1654 2/Modellezo_csapat/Sara/published_models_validation_results/'  
1655 16.  
1656 17. #Load cell model  
1657 18. model = ModelLoader(mod_files_path = mod_files_path )  
1658 19.  
1659 20. # outputs will be saved in subfolders named like this:  
1660 21. model.name="Bianchi_et_al_2012"  
1661 22.  
1662 23. # path to hoc file  
1663 24. # the model must not display any GUI!!  
1664 25. model.hocpath = "/home/saray/published_models/Ca1_Bianchi_2012/experiment/main_model.hoc"  
1665 26.  
1666 27. # If the hoc file doesn't contain a template, this must be None (the default value is None)
```

```
1667 28. model.template_name = None
1668 29.
1669 30. # model.SomaSecList_name should be None, if there is no Section List in the model for the soma
1670     , or if the name of the soma section is given by setting model.soma (the default value is None
1671     )
1672 31. model.SomaSecList_name = None
1673 32. # if the soma is not in a section list or to use a specific somatic section, add its name here
1674     :
1675 33. model.soma = 'soma[0]'
1676 34.
1677 35. # For the PSP Attenuation Test, and Back-
1678     propagating AP Test a section list containing the trunk sections is needed
1679 36. model.TrunkSecList_name = 'apical_trunk_list'
1680 37. # For the Oblique Integration Test a section list containing the oblique dendritic sections is
1681     needed
1682 38. model.ObliqueSecList_name = 'oblique_dendrites'
1683 39. # This will be argument to those tests, where dendritic locations are selected according to
1684     distances. If not set, the end of the above given soma section will be used as reference point
1685     for distance determination
1686 40. trunk_origin = ['soma[0]', 1]
1687 41.
1688 42. model.v_init = -70
1689 43. model.celsius = 34
1690 44.
1691 45. # It is possible to run the simulations using variable time step (default for this is False)
1692 46. model.cvode_active = True
```

1693 The target experimental data and the configuration file are loaded from the JSON files  
1694 to the *observation* and *config* dictionaries, which are arguments of the test class:

```
1695 47. # Load target data
1696 48. with open('/home/saray/target_features/feat_CA1_pyr_cACpyr_more_features.json') as f:
1697 49.     observation = json.load(f, object_pairs_hook=collections.OrderedDict)
1698 50.
1699 51. # Load stimuli file
1700 52. ttype = "CA1_pyr_cACpyr"
```

```
1701 53.  
1702 54. stim_file = pkg_resources.resource_filename("hippounit", "tests/stimuli/somafeat_stim/stim_" +  
1703     ttype + ".json")  
1704 55. with open(stim_file, 'r') as f:  
1705 56.     config = json.load(f, object_pairs_hook=collections.OrderedDict)
```

1706 Then the test class is instantiated, and its `judge()` function (inherited from `SciUnit`) is  
1707 called to run the test. The number of parallel processes to be used can be controlled by the user  
1708 by setting the `test.npool` parameter.

```
1709 57. # Instantiate test class  
1710 58. test = tests.SomaticFeaturesTest(observation=observation, config=config, force_run=False, show  
1711     _plot=True, save_all = True, base_directory=base_directory)  
1712 59.  
1713 60. # test.specify_data_set is added to the name of the subdirectory (somaticfeat), so test runs u  
1714     sing different data sets can be saved into different directories  
1715 61. test.specify_data_set = 'UCL_data'  
1716 62.  
1717 63. # Number of parallel processes  
1718 64. test.npool = 30  
1719 65. #Run the test  
1720 66. score = test.judge(model)  
1721 67. #Summarize and print the score achieved by the model on the test using SciUnit's summarize fun  
1722     ction  
1723 68. score.summarize()
```

1724 For further details on how to run the different tests of HippoUnit for the different  
1725 models, see the Jupyter Notebooks available here:  
1726 [https://github.com/KaliLab/HippoUnit\\_demo/tree/master/jupyter\\_notebooks](https://github.com/KaliLab/HippoUnit_demo/tree/master/jupyter_notebooks).
